# Supplementary material
Source: PubMed Central journal article supplement (PMC110687)
Supplement: nar_28_17_3339__1.pdf [file nar_28_17_3339__1.pdf]

## SUPPLEMENTARY MATERIAL

Table S1. Sampled sequences

*A. thaliana* sequences included in the analysis.

| GenBank acc. no. | Description                                         | GenBank acc. no. | description                                 |
|------------------|-----------------------------------------------------|------------------|---------------------------------------------|
| AF154272         | Pinehead                                            | AF069468         | Sterol-C5-desaturase                        |
| AF133708         | Protein Phosphatase 2A regulatory subunit           | AB027151         | Threonine synthase                          |
| AF057024         | Ran-binding protein                                 | AF085354         | Shrunken seed protein                       |
| D10910           | Serine/threonine protein kinase                     | AF132606         | Transcription factor CRC                    |
| AF136152         | PUR alpha like protein                              | U88061           | SNF5 homolog BSH                            |
| AF080676         | Cytidine deaminase 8                                | AF047834         | 4-hydroxyphenylpyruvate dioxygenase         |
| AF020433         | Cyclophilin                                         | AF019927         | GSK3/shaggy-like protein kinase             |
| AF154574         | Trans-Golgi localized tSNARE                        | AF082176         | Auxin response factor 9                     |
| AF132477         | Heme oxygenase 2                                    | AF033587         | Serine/arginine-rich protein SRZ-21         |
| AF132212         | OPDA-reductase homolog                              | AF135455         | Phytochrome A supressor                     |
| AF060874         | Glycosylphosphatidylinositol-anchored protein       | AF117296         | ER type calcium-transporting ATPase 3       |
| AF153677         | Vacuolar H <sup>+</sup> -ATPase subunit c isoform 4 | AB026987         | Dynamin-like protein                        |
| AF138281         | Phospholipase D-gamma-2                             | U92460           | 12-oxophytodienoate reductase               |
| AF126057         | Microtubule-associated protein                      | AF140219         | Nuclear cap-binding protein                 |
| AF130878         | Phosphoribosylanthranilate isomerase                | AF091112         | ATP dependent Cu transporter                |
| AB020975         | Lipoyltransferase                                   | AB022891         | Glucose-1-phosphate adenylyltransferase     |
| AF144382         | Glutathione S-transferase                           | AF134133         | Chromosome IV Lil3 protein                  |
| AB021120         | RNA polymerase sigma subunit                        | AF134132         | Chromosome IV early light-inducable protein |
| AF085231         | Phytochelatin synthase 1                            | AF134131         | PsbS protein                                |
| AF051326         | Dimethyladenosine transferase                       | AF134120         | PS I antenna protein LHCl-680               |
| AF153284         | Progesterone-binding protein homolog                | AF081067         | IAA-Ala hydrolase                           |
| AF109721         | RNA-binding protein                                 | AF124524         | Gamma-adaptin 1                             |
| AF083913         | Annexin                                             | AF121355         | Peroxiredoxin TPx1                          |
| AF149816         | IAA28                                               | AF128407         | EDS1lipase homolog                          |
| AF145045         | Homolog of TatC/YCF43                               | AF134155         | Ring finger protein                         |
| AF141375         | Protodermal factor 1                                | AF126009         | Clavata3                                    |
| AF076251         | Calcineurin B-like protein 1                        | D89055           | Germin-like protein precursor               |
| AF082525         | Homoserine kinase                                   | AF110407         | ATP sulphurylase precursor                  |
| AB027507         | ACE (Adhesion of Calyx Edges)                       | AB018408         | 3-phosphoserine phosphatase                 |
| AB027506         | TSF (Twin Sister of FT)                             | AF073361         | Nitrate transporter NTL1                    |
| AB027504         | FT (Flowering locus T)                              | AF126374         | At14a protein                               |
| AF139188         | Thylakoid membrane component protein                | AF080249         | Kinesin-like heavy chain                    |
| AF130973         | Peroxisomal targeting signal type 2 receptor        | AF076253         | Calcineurin B-like protein 3                |
| AF088917         | Cellulose synthase catalytic subunit                | AF136538         | YABBY1                                      |
| AF141977         | AtHVA22a                                            | AF120335         | Putative transposase                        |
| AF141853         | Mevalonate kinase                                   |                  |                                             |

Table S1. Continued

*B. napus* sequences included in the analysis

| GenBank<br>acc. no. | description                                  | GenBank<br>acc. no. | description                                   |
|---------------------|----------------------------------------------|---------------------|-----------------------------------------------|
| AF155224            | Putative diacylglycerol acyltransferase      | D63166              | Phosphocholine cytidylyltransferase           |
| AF118383            | Plasma membrane intrinsic protein 2          | D63151              | Calcium-binding protein                       |
| J04468              | Malate synthase                              | D38220              | Nitrate reductase                             |
| AF139818            | Oxygen evolving protein of photosystem II    | D13987              | Phosphoenolpyruvate carboxylase               |
| AB014076            | Histidine decarboxylase                      | U59379              | Thioredoxin-h-like-1                          |
| AF069772            | Calcium-binding protein                      | U68218              | ATP sulphurylase                              |
| AF108123            | Phosphoinositide-specific phospholipase C    | U68217              | Ferritin                                      |
| AF136223            | Putative cell-wall protein                   | U66193              | S locus-linked 2                              |
| S47089              | ATPase subunit 6                             | U86642              | Pollen-specific protein Bnm1                  |
| AF081796            | Fructose-1,6-bisphosphatase precursor        | U22105              | Germination-specific lipid transfer protein 1 |
| AF101038            | Nonspecific lipid-transfer protein precursor | U70666              | Pathogenesis-related protein                  |
| AF111812            | Actin                                        | U65890              | 10 kDa chaperonin                             |
| F105140             | Disease resistance homolog                   | U27107              | Transcription factor                          |
| AF097522            | Laminin receptor-like protein                | U59459              | Antifungal protein                            |
| AF060884            | Desiccation protein                          | U55032              | Aspartic protease                             |
| AF000307            | Steroid sulfotransferase 3                   | U21849              | PR-1a                                         |
| AF057027            | Response regulator protein                   | U50771              | Fatty acid elongase                           |
| 3650422             | BNTFL1-3                                     | U18365              | Cyclin dependent protein kinase               |
| U39289              | Myrosinase-associated protein                | J02798              | Napin seed storage protein                    |
| U33884              | CCAAT-binding factor B subunit homolog       | U21743              | Germin-like protein                           |
| L47352              | Arabinogalactan protein                      | U15604              | Tonoplast ATPase 70 kDa                       |
| AF076335            | Chalcone synthase B1                         | U20179              | Fructose 1,6-bisphosphatase                   |
| AF015310            | BTH1                                         | U17987              | Putative nitrate transporter                  |
| AF016011            | Constans homolog                             | L19879              | Polygalacturonase                             |
| AF055707            | Ribosomal protein S4                         | L33283              | STA 41-9                                      |
| AB013447            | Aluminum-induced protein                     | L10736              | S-locus related glycoprotein                  |
| AF049028            | BURP domain containing protein               | L34287              | Stigma protein                                |
| U59443              | Myrosinase-binding protein                   | U14665              | Low-temperature regulated protein             |
| AF052241            | Unknown                                      | U22665              | AGL15 type 1                                  |
| AF018174            | Thioredoxin-f                                | U22175              | Germination-specific lipid transfer protein 3 |
| AF024625            | Arm repeat containing protein                | M60068              | Acetolactate synthase                         |
| AF035414            | Heat shock cognate protein                   | L22962              | Omega-3 fatty acid desaturase                 |
| AF009563            | 3-ketoacyl-CoA synthase                      | L25406              | Cyclin                                        |
| AF019376            | Calreticulin                                 | M97667              | Serine/threonine kinase receptor              |
| U54827              | Histone H3 homolog                           | L08482              | Isocitrate lyase                              |
| L08607              | S-receptor kinase                            | AF118381            | Tonoplast intrinsic protein                   |
| L01418              | Linoleate desaturase                         | M81224              | Kin1 protein                                  |
| M16860              | Cruciferin                                   | M83334              | ATPase subunit 6                              |
| M95835              | Endochitinase                                | U12133              | RNA polymerase II subunit RPB10 homolog       |
| M99415              | BAG1                                         | U10150              | Calmodulin                                    |

Table S1. Continued

*L. esculentum* sequences included in the analysis.

| GenBank<br>acc. no. | description                                                 | GenBank<br>acc. no. | description                                              |
|---------------------|-------------------------------------------------------------|---------------------|----------------------------------------------------------|
| AF150096            | Small zinc finger-like protein                              | AF093141            | Fruit-ripening protein                                   |
| AB013346            | 1-aminocyclopropane-1-carboxylate synthase                  | U67131              | Heat shock induced transcript 2                          |
| AF143812            | 1-D-deoxyxylulose 5-phosphate synthase                      | U88089              | ADP-glucose pyrophosphorylase large subunit 1            |
| AF050496            | Ca <sup>2+</sup> -ATPase mRNA                               | U83708              | Farnesyl protein transferase subunit B                   |
| AJ005173            | Serine protease                                             | U26423              | Dehydrin                                                 |
| AF123266            | Remorin 2                                                   | U65391              | Pseudomonas resistance and fenthion sensitivity protein  |
| AF118844            | Ethylene receptor homolog                                   | U55278              | DCL                                                      |
| AF136580            | Iron-regulated transporter 2                                | U28403              | RNA polymerase II subunit 2                              |
| AF123257            | 17.6 kDa class I small heat shock protein                   | AF035631            | Germacrene C synthase                                    |
| AF118127            | Disease resistance protein                                  | L25128              | Auxin-induced proteinase inhibitor                       |
| AB022687            | LeArcA2 protein                                             | AF090115            | Cytosolic class II small heat shock protein              |
| AF088276            | NADPH oxidase                                               | AB004558            | Acid invertase                                           |
| AF014810            | Proline transporter 3                                       | AF043122            | ACC synthase                                             |
| AB013101            | 1-aminocyclopropane-1-carboxylate oxidase                   | U84140              | Self-pruning protein                                     |
| AB010992            | 3b-hydroxylase                                              | AF020390            | Beta-galactosidase                                       |
| Y17277              | Subtilisin-like protease                                    | AF017252            | Importin alpha                                           |
| AJ002281            | Phytochrome B1                                              | AF033194            | Dehydroquinase dehydratase/shikimate:NADP oxidoreductase |
| AF118567            | Polygalacturonase                                           | AJ003137            | Cysteine protease                                        |
| AF049900            | Gibberellin 20-oxidase-3                                    | U58474              | Receptor-like protein kinase                             |
| AF059489            | Expansin precursor                                          | AB012138            | Germin-like protein                                      |
| AF117707            | Copper/zinc superoxide dismutase copper chaperone precursor | AF043085            | Ethylene receptor homolog                                |
| AF110519            | Ethylene-inducible CTR1-like protein kinase                 | AB001389            | Ca <sup>2+</sup> -dependent lipid-binding domain protein |
| AF098292            | Endo-beta-1,4-D-glucanase                                   | U77719              | Ethylene-responsive late embryogenesis-like protein      |
| AF098674            | Lateral suppressor protein                                  | AF017144            | (1-4)-beta-mannan endohydrolase                          |
| AF016713            | Oligopeptide transporter                                    | AF053993            | Disease resistance protein                               |
| U76410              | Homeobox 2 protein                                          | AF048747            | Farnesyl pyrophosphate synthase                          |
| U76408              | Knotted 3 protein                                           | AF093743            | Pathogenesis-related protein osmotin precursor           |
| AF029984            | COP1 homolog                                                | U70076              | LeMir                                                    |
| AF091048            | Disease resistance protein                                  | AF030292            | Ornithine decarboxylase                                  |
| AF079232            | Annexin p34                                                 | U28007              | Pto kinase interactor 1                                  |
| AF053998            | Hcr2-5D                                                     |                     |                                                          |

Table S1. Continued

*N. tabacum* sequences included in the analysis

| GenBank acc. no. | description                                  | GenBank acc. no. | description                                         |
|------------------|----------------------------------------------|------------------|-----------------------------------------------------|
| AB018441         | Phi-1                                        | AF009127         | NAP1-2                                              |
| AF068724         | MADS-box protein                             | U73939           | Protein kinase                                      |
| D90196           | Pathogenesis-related protein precursor       | U64926           | Geranylgeranylated protein                          |
| AB021178         | NAC-domain protein                           | AF049350         | Alpha-expansin precursor                            |
| AF153278         | DNA-directed RNA polymerase IIb              | AF083343         | Heat shock protein 101 kDa                          |
| AF149981         | Sucrose transporter-like protein             | D10524           | Glutathione S-transferase                           |
| AF141654         | Beta-1,3-glucanase                           | AF032465         | Putative serine/threonine protein kinase            |
| AF149251         | Secretory peroxidase                         | AF053104         | Peroxisomal targeting signal 1 receptor             |
| AF098636         | Chaperone GrpE type 2                        | AB008892         | Chitinase 134                                       |
| AF124371         | NT4                                          | AB008200         | Phenylalanine ammonia-lyase                         |
| AF099969         | Sterol-C5(6)-desaturase homolog              | AB010717         | Sulfite reductase                                   |
| AF133209         | Putative chloride channel protein            | U91723           | 14-3-3 protein isoform b                            |
| AB020590         | Transcription factor                         | AF021220         | Cation-chloride co-transporter                      |
| AB020023         | DNA-binding protein NtWRKY3                  | U90212           | DNA binding protein ACBF                            |
| AH007670         | Calcium/calmodulin-dependent protein kinase  | U66264           | Ubiquitin                                           |
| F120093          | Elongation factor 1-alpha                    | U66263           | Tumor-related protein                               |
| AF120092         | CCAAT-binding transcription factor subunit B | U62735           | Caffeoyl-CoA O-methyltransferase 3                  |
| AB025715         | Homeobox 22                                  | U34817           | Violaxanthin de-epoxidase precursor                 |
| D89984           | Ornithine decarboxylase                      | U69154           | Prohibitin                                          |
| AB024575         | Ethylene responsive element binding factor   | U35620           | Rubisco large subunit N-methyltransferase           |
| AB015222         | NtcdcD3-1                                    | U43542           | Diphenol oxidase                                    |
| AB015221         | NtRb1                                        | U52078           | Kinesin-like protein                                |
| AB000834         | Thaumatococcus-like protein                  | L38260           | Acetyl-CoA carboxylase (biotin carboxylase subunit) |
| AF113545         | Vacuole-associated annexin                   | AF020424         | Glutamate decarboxylase isozyme 2                   |
| AB025573         | KN1-type homeobox protein                    | AB004797         | NTH23                                               |
| AF117339         | FtsH-like protein Ptf precursor              | AB017502         | Beta-D-glucan exohydrolase                          |
| AB017694         | WREBP-2                                      | D38123           | Ethylene-responsive transcription factor            |
| AB017533         | Phosphoprotein EPc                           | U81312           | S-adenosyl-methionine-sterol-C-methyltransferase    |
| AB015855         | Ethylene-insensitive transcription factor    | U57350           | Epoxide hydrolase                                   |
| AF118129         | Tsi1-interacting protein TSIP1               | AF112863         | Syntaxin-related protein                            |
| AF097180         | Cystathionine gamma-synthase precursor       | AF115482         | Topoisomerase I                                     |
| AF096299         | DNA-binding protein WRKY2                    | AF044129         | Protoporphyrinogen oxidase                          |

Table S1. Continued

*P. sativum* sequences included in the analysis.

| GenBank acc. no. | description                                    | GenBank acc. no. | description                                |
|------------------|------------------------------------------------|------------------|--------------------------------------------|
| AF109922         | Sucrose transport protein                      | AF079850         | Nodule-enhanced malate dehydrogenase       |
| AF043108         | Spermidine synthase 1                          | AF065444         | Root iron transporter protein              |
| AB021873         | Ribosome-sedimenting protein                   | AF063246         | Cell wall invertase                        |
| AF145976         | G protein beta subunit                         | AF061962         | SAR DNA-binding protein                    |
| AF144708         | Thylakoid membrane protein                     | AF056493         | Pectin methylesterase                      |
| AF115574         | Pathogenesis-related protein                   | U24398           | Cold-induced peaci11.8                     |
| AB026253         | Copper amine oxidase                           | AF034743         | UDP-glucuronosyltransferase                |
| D13296           | Precursor for 23-kDa protein of photosystem II | AF039746         | ERS-like ethylene receptor                 |
| D10661           | Chalcone synthase                              | U31565           | Reversibly glycosylatable polypeptide      |
| AF014821         | Developmentally regulated GTP binding protein  | D89619           | Cycloartenol synthase                      |
| AJ132614         | LegA class precursor                           | AF029242         | Dormancy-associated protein                |
| AF107404         | Sophorol reductase                             | AF014399         | Mg-chelatase subunit D                     |
| AF016458         | 1-aminocyclopropane-1-carboxylate synthase     | U79958           | BP-80 vacuolar sorting receptor            |
| L81139           | Ubiquitin (PUB1)                               | U84198           | Lipoxygenase                               |
| AF043905         | Plastoglobule associated protein PG1 precursor | U81287           | Glycine-rich RNA-binding protein           |
| AF030516         | Leaf cytosolic bifunctional enzyme             | AF016460         | 1-aminocyclopropane-1-carboxylate synthase |
| AF004843         | Stamina pistilloidia                           | D88262           | Chalcone synthase                          |
| AF004730         | Gibberellin 3B-hydroxylase le-3 allele         | U05293           | Aspartate carbamoyltransferase             |
| U79562           | Defender against death homolog Peadad          | U49978           | Imidazoleglycerol-phosphate dehydratase    |
| AF095285         | Chloroplast inner envelope membrane protein    | U85045           | 2-oxoglutarate-dependent dioxygenase       |
| M81864           | Albumin 1                                      | U63298           | Famesyltransferase alpha subunit           |
| AF034419         | Cytosine-5 DNA methyltransferase               | U63652           | Ent-kaurene synthase A                     |
| AF030709         | Poly(A) polymerase                             | D86052           | Nucleoside diphosphate kinase              |
| AF010578         | Polynucleotide phosphorylase                   | D10003           | Phenylalanine ammonia-lyase                |
| U43401           | Putative transmembrane protein                 | D86494           | Diminuto                                   |
| U69554           | 6a-hydroxymaackiain methyltransferase          | U44947           | Putative cysteine protease                 |
| AF010190         | Unifoliata protein                             | U81049           | Actin                                      |
| U56419           | Import intermediate associated protein         | U60592           | S-adenosylmethionine decarboxylase         |
| U35831           | Thioredoxin m                                  | U28925           | Cytosolic glutamine synthetase             |
| U31981           | Root nodule lectin                             | X07014           | Minor legumin                              |
| 3608178          | Cyclin D                                       | Z25471           | Blue copper protein                        |
| AB008186         | Proliferating cell nuclear antigen             | U56697           | Pyruvate dehydrogenase E1beta subunit      |
| AF080104         | Knotted I class homeodomain protein            | L41046           | Endo-1,4-beta-glucanase                    |
| AF081457         | Pectin methylesterase                          | U13882           | Calmodulin                                 |
| AF063307         | Knox class 1 protein                           | U21105           | Chloroplast chaperonin precursor           |
| AF079851         | Nodule-enhanced sucrose synthase               | AB015428         | Endoxyloglucan transferase                 |

Table S1. Continued

*G. max* sequences included in the analysis

| GenBank acc. no. | description                                                   | GenBank acc. no. | description                                |
|------------------|---------------------------------------------------------------|------------------|--------------------------------------------|
| AF135862         | Precursor monofunctional aspartokinase                        | AF091304         | Aminoacyl peptidase                        |
| AF089851         | Peroxisomal copper-containing amine oxidase                   | AF030231         | Sucrose synthase                           |
| AF089850         | Urate-degrading peroxidase                                    | AF069738         | Symbiotic ammonium transporter             |
| AB029159         | GmMYB291                                                      | D50866           | Beta-amylase                               |
| AB008679         | Beta subunit of beta conglycinin                              | AF034572         | Proteasome IOTA subunit                    |
| AB008678         | Alpha subunit of beta conglycinin                             | AF074940         | Ferric leghemoglobin reductase-2 precursor |
| U44850           | G beta-like protein                                           | AF068249         | Biotin carboxylase precursor               |
| D86929           | Uricase                                                       | AF048978         | 2,4-D inducible glutathione S-transferase  |
| AF135485         | Cytochrome P450 monooxygenase                                 | AF020193         | DNA polymerase delta                       |
| AF100159         | Hydrophobic seed protein precursor                            | U82810           | Early light-induced protein                |
| AF145348         | Peroxidase                                                    | AB013289         | Allergenic protein                         |
| AF141602         | Cystathionine-gamma-synthase precursor                        | L28831           | Ribosomal protein S11                      |
| AF136636         | PR1a precursor                                                | U55874           | Asparagine synthetase                      |
| F051159          | Ribonucleotide reductase small subunit                        | L28003           | TGACG-motif binding protein                |
| AF117885         | Seed maturation protein                                       | AF035671         | Arginase                                   |
| AB007127         | Acidic chitinase                                              | AF007100         | Biotin carboxylase precursor               |
| AF068686         | Geranylgeranyl hydrogenase                                    | AF014502         | Seed coat peroxidase precursor             |
| AF068686         | Nodule-enhanced malate dehydrogenase                          | D00216           | Glycinin A2B1a subunit                     |
| AF128443         | SNF-1-like serine/threonine protein kinase                    | AF024652         | Polyphosphoinositide binding protein       |
| U25027           | Phosphatidylinositol-specific phospholipase C                 | AF035252         | Catalase                                   |
| AB025102         | Protoporphyrinogen IX oxidase                                 | AF031241         | ER HSC70-cognate binding protein precursor |
| AF124148         | Trehalase 1                                                   | AB008540         | Phosphoenolpyruvate carboxylase            |
| AB004062         | Glycinin                                                      | AF019115         | Putative cadmium-transporting ATPase       |
| AF127804         | Ascorbate peroxidase                                          | AB007907         | 6-phosphogluconate dehydrogenase           |
| AF105221         | Glutamyl-tRNA reductase precursor                             | AB007503         | Squalene synthase                          |
| L07647           | Chalcone synthase                                             | AF004809         | Ca <sup>2+</sup> -binding EF hand protein  |
| U71195           | Napin-type 2S albumin 3                                       | AF004808         | Metallothionein-II protein                 |
| AF007211         | Peroxidase precursor                                          | AF004805         | Em protein                                 |
| U12150           | Protease inhibitor                                            | AF019910         | GRR1 homolog                               |
| AF039027         | Cationic peroxidase 2                                         | U40666           | Biotin carboxyl carrier protein precursor  |
| AF065435         | Nodulin                                                       | U64866           | Aluminum induced                           |
| AF095445         | NADP-dependent isocitrate dehydrogenase                       | D45857           | Mg chelatase subunit (46 kDa)              |
| U59626           | 68 kDa LEA protein                                            | D50868           | Mitotic cyclin a1-type                     |
| AF034210         | Aspartate aminotransferase glyoxysomal isozyme AAT1 precursor | U36430           | Dynamin-like protein                       |
| U77679           | Asparagine synthetase 1                                       | U36191           | Lipoxygenase                               |
| U43838           | Choline kinase                                                | U20260           | Glutamate 1-semialdehyde aminotransferase  |
| U42608           | Clathrin heavy chain                                          |                  |                                            |

Table S1. Continued

*O. sativa* sequences included in the analysis.

| GenBank acc. no. | description                                                      | GenBank acc. no. | description                                 |
|------------------|------------------------------------------------------------------|------------------|---------------------------------------------|
| AF155333         | NADP-specific isocitrate dehydrogenase                           | AB020502         | Catalase                                    |
| AB018377         | Early nodulin                                                    | AF067194         | S-adenosylmethionine decarboxylase          |
| AF150113         | Small zinc finger-like protein                                   | D83727           | Elongation factor 1 beta 2                  |
| AB029060         | F1F0-ATPase inhibitor                                            | D11385           | Prolamin                                    |
| AB028885         | Knotted1-type homeobox protein                                   | AF093636         | Plastocyanin precursor                      |
| AB003495         | 4-reductase dihydroflavonol                                      | AF093633         | Histone H3                                  |
| AB008845         | NADH dependent glutamate synthase                                | AF093632         | High mobility group protein                 |
| D67043           | Aspartate aminotransferase                                       | AF093631         | Rieske Fe-S precursor protein               |
| D50317           | ADP glucose pyrophosphorylase large subunit                      | AF093629         | Inorganic pyrophosphatase                   |
| D01000           | Copper/zinc-superoxide dismutase                                 | D89802           | Elongation factor 1B gamma                  |
| AF066050         | Thymidine kinase                                                 | U25970           | Early embryogenesis                         |
| AF110382         | 3-hydroxy-3-methylglutaryl-coenzyme A reductase                  | AF047444         | Ribulose-5-phosphate-3-epimerase            |
| AF141965         | MADS-box protein                                                 | AF069773         | Putative type 1a plasma membrane receptor   |
| AF155334         | NADP-specific isocitrate dehydrogenase                           | AF049356         | Phytoene desaturase precursor               |
| AF145727         | Homeodomain leucine zipper protein                               | AF046884         | Late embryogenesis abundant group 3 protein |
| AB020973         | Heat shock protein 26                                            | AF040700         | Methionyl-tRNA synthetase                   |
| D38445           | Ferredoxin-NADP+ reductase                                       | AF062479         | Protein kinase                              |
| AF017358         | Lipid transfer protein                                           | AF052503         | S-phase-specific ribosomal protein          |
| AF133118         | Nucleic acid binding protein                                     | AF052203         | 23 kDa polypeptide of photosystem II        |
| AB027429         | beta-1,3-glucanase                                               | AF065992         | Floral meristem identity protein            |
| AB027425         | Class III chitinase homologue                                    | AB010876         | Germin-like protein 1                       |
| U46159           | Type 1 metallothionein-like                                      | AB003496         | Dihydroflavonol 4-reductase                 |
| AB027123         | Cytochrome c oxidase subunit 5c                                  | AF001396         | Metallothionein-like protein                |
| AB027054         | Nitrilase-like protein                                           | AF044059         | Proteinase inhibitor                        |
| AF143746         | CER1 homolog                                                     | AF097724         | 33-kDa secretory protein                    |
| AB019533         | NAD-dependent formate dehydrogenase                              | U72251           | Beta-1,3-glucanase precursor                |
| AB007405         | Alanine aminotransferase                                         | U57640           | Bowman-Birk type trypsin inhibitor          |
| AB013449         | Pi-b                                                             | U57639           | Hydrophobic LEA-like protein                |
| D85764           | Cytosolic monodehydroascorbate reductase                         | U31773           | Protein phosphatase 1                       |
| D85763           | Glyoxysomal malate dehydrogenase                                 | D13512           | Cytoplasmic aldolase                        |
| D78136           | Cytosolic glutathione reductase                                  | AB023402         | Thymidylate synthase                        |
| AB021746         | Nicotianamine synthase 1                                         | AB022674         | Chloroplast ribosomal protein L12           |
| AF134807         | Putative dihydroflavonol reductase                               | AB021736         | Seed bZIP protein                           |
| D82039           | Serine/threonine protein kinase                                  | AB021747         | Farnesyl diphosphate synthase               |
| AF073695         | Cysteine synthase                                                | AB018442         | Phytochrome C                               |
| AF121139         | RIM2 protein                                                     | AB018376         | OsENOD93a early nodulin                     |
| AB019240         | RPR1 homologue                                                   | AB017042         | Glyoxalase I                                |
| AB017914         | Nucleotide binding, leucine-rich protein                         | AB015204         | Plastidic ATP sulfurylase                   |
| AB024054         | OsENOD40                                                         | AF042275         | Anther-specific protein                     |
| AB012765         | Vacuolar H <sup>+</sup> -translocating inorganic pyrophosphatase |                  |                                             |

Table S1. Continued

*T. aestivum* sequences included in the analysis

| GenBank acc. no. | description                                  | GenBank acc. no. | description                                              |
|------------------|----------------------------------------------|------------------|----------------------------------------------------------|
| AF156977         | (1,4)-beta-xylan endohydrolase               | U81318           | Poly(A)-binding protein (wheatpab)                       |
| AF107027         | Histone H1                                   | U80037           | ABA induced plasma membrane protein                      |
| AH005224         | Serine-threonine protein kinase              | U60754           | Delta-24-sterol methyltransferase                        |
| AF139915         | ABA-inducible protein                        | U42336           | ACC synthase                                             |
| AF145590         | Putative hmw glutenin precursor              | U73218           | Chlorophyll a/b-binding protein WCAB precursor           |
| AF144104         | Gamma-gliadin GAG56D-FO allele               | AF112966         | Chitinase IV precursor                                   |
| AF076679         | Endosperm starch branching enzyme-I          | U66376           | 1,4-alpha-D-glucan6-alpha-D-(1,4-alpha-D-glucanotransf.) |
| AB019624         | Starch synthase                              | U51304           | Alpha-gliadin storage protein                            |
| AF112967         | Beta-1,3-glucanase precursor                 | L28009           | Wali6                                                    |
| U73217           | Cold acclimation protein                     | AF002820         | Starch branching enzyme I                                |
| AF112964         | Small GTP-binding protein                    | U22442           | Adenine phosphoribosyltransferase form 1                 |
| AF112963         | Chitinase II precursor                       | U32310           | Single-stranded nucleic acid binding protein             |
| F120148          | Myo-inositol 1-phosphate synthase            | M62893           | DNA binding protein                                      |
| AF113844         | Granule-bound starch synthase precursor      | L11882           | Unknown                                                  |
| AB019617         | Early light-inducible protein                | M94959           | Protein associated with pathogen defense                 |
| AF097363         | Heat shock protein 101                       | M55604           | Ubiquitin activating enzyme E1                           |
| U91983           | Phosphatidylserine synthase                  | L11872           | S-adenosyl-L-homocysteine hydrolase                      |
| AF117660         | S-adenosylmethionine decarboxylase precursor | M37477           | Rubisco                                                  |
| AF031231         | S222                                         | J02817           | Gibberellin responsive protein                           |
| AF031195         | Blue copper-binding protein homolog          | M63224           | Germin                                                   |
| AF004816         | Unknown                                      | M60599           | Dihydrodipicolinate synthase                             |
| U91981           | Pollen allergen homolog                      | F002211          | Glutathione-S-transferase                                |
| U86762           | Gamma-type tonoplast intrinsic protein       | D38111           | Transcription factor                                     |
| U76744           | Beta-tubulin 1                               | D16416           | Putative zinc-finger protein                             |
| U76558           | Alpha-tubulin                                | D13795           | Tritin                                                   |
| U76384           | o-methyltransferase                          | D38090           | Histone H2A                                              |
| U23409           | p34cdc2                                      | D16457           | Endo-xyloglucan transferase                              |
| AF109714         | Glutathione S-transferase                    | D86327           | Catalase                                                 |
| F030420          | Cell wall invertase                          | D64051           | bZIP-type protein HALF-1                                 |
| D12920           | Transcription factor HBP-1a                  | D84390           | Alpha-1 purothionin                                      |
| AB011670         | Protein kinase                               | U91834           | Root abundant protein                                    |
| AB008497         | LMW glutenin                                 | F027193          | Receptor-like kinase                                     |
| AB007506         | MADS box transcription factor                | AF079318         | MAP kinase homolog                                       |
| AF092524         | Manganese superoxide dismutase               | D84678           | Omega-3 fatty acid desaturase                            |
| U51330           | Leaf rust resistance kinase                  | AF058794         | COR39                                                    |
| U58278           | Actin-binding protein                        | AF004018         | Beta purothionin precursor                               |
| U32430           | Thiol protease                               | U87163           | Germ initiation factor 2 beta subunit                    |
| U32429           | Sulfur-rich/thionin-like protein             | AB005555         | Gibberellin 20-oxidase                                   |



Table S1. Continued

*H. vulgare* sequences included in the analysis.

| GenBank acc. no. | description                                                 | GenBank acc. no. | description                                      |
|------------------|-------------------------------------------------------------|------------------|--------------------------------------------------|
| AF102868         | Beta-D-glucan exohydrolase isoenzyme Exol                   | M96939           | Glucan endo-1,3-beta-glucosidase (isoenzyme V)   |
| AB024058         | Iron-deficiency specific protein                            | U01228           | Harrington haemoglobin apoprotein                |
| D88272           | Formate dehydrogenase                                       | M98254           | PSI-D subunit of photosystem I                   |
| AB019525         | Nicotianamine synthase 7                                    | AF022390         | Knotted class 1 homeodomain protein              |
| S72926           | Ribitol dehydrogenase homolog                               | S69616           | Dihydroflavonol-4-reductase                      |
| L36959           | Carbonic anhydrase                                          | X95277           | Serpin                                           |
| D83178           | Endonuclease                                                | U01963           | Germin subunit                                   |
| D88383           | Glutamyl-tRNA reductase                                     | M29280           | Root-specific lectin                             |
| AB009309         | Plasma-membrane type water channel                          | M21400           | Chymotrypsin inhibitor                           |
| L37358           | Lipoxygenase 2                                              | M27303           | Calmodulin                                       |
| M31545           | Glutamate 1-semialdehyde aminotransferase                   | J01236           | Alpha-amylase type A isozyme                     |
| D82941           | D hordein                                                   | M60175           | Ubiquitin (mub1)                                 |
| D63835           | S-adenosylmethionine synthetase                             | M55685           | L-lactate dehydrogenase                          |
| D26448           | Betaine aldehyde dehydrogenase                              | U20777           | Catalase                                         |
| D21349           | Beta-amylase                                                | U49505           | Profilin                                         |
| U57845           | Pollen allergen precursor                                   | U19359           | Cysteine proteinase                              |
| U43497           | Putative 32.7 kDa jasmonate-induced protein                 | D26448           | Betaine aldehyde dehydrogenase                   |
| U43493           | Ribulose-1,5-bisphosphate carboxylase small subunit         | AF136942         | Nicotianamine synthase 2                         |
| L11873           | Vacuolar ATPase B subunit                                   | AF000940         | Ribonuclease                                     |
| L48286           | Signal recognition particle 54 kDa subunit                  | U73749           | Xylan endohydrolase isoenzyme X-I                |
| L33251           | Disulfide isomerase                                         | U88090           | Nonspecific lipid transfer protein               |
| M55449           | Rubisco activase                                            | U83414           | Cytosolic triosephosphate isomerase              |
| M61146           | Photosystem I hydrophobic protein                           | U49482           | Low temperature-responsive RNA-binding protein   |
| L32165           | Heat-shock protein HSP70                                    | U22450           | Alpha-glucosidase                                |
| M19048           | Leaf specific thionin                                       | Z23130           | Protein synthesis elongation factor-1 alpha      |
| L36093           | Peroxidase                                                  | X07774           | Alcohol dehydrogenase 1                          |
| M15207           | Probable amylase/protease inhibitor                         | U26916           | Protoporphyrin IX Mg-chelatase subunit precursor |
| M60410           | Beta-ketoacyl-ACP synthase I                                | U52867           | High affinity sulfate transporter                |
| M62905           | Ribosome-inactivating protein                               | AF056325         | Myo-inositol 1-phosphate synthase                |
| M62904           | 26kDa chitinase                                             | AF017430         | Early embryogenesis associated protein           |
| M62907           | (1-3)-beta-glucanase                                        | U87148           | Nucellin                                         |
| M64372           | Embryo globulin                                             | AB009307         | Bpw1                                             |
| M36000           | Abscisic acid (ABA) induced protein                         | D50641           | Plant metallothionein-like protein               |
| M24425           | Acyl carrier protein I                                      | U89510           | Beta-ketoacyl reductase                          |
| AF021256         | 32 kDa protein from a family of jasmonate-regulated genes   | AF020791         | Ferrochelatase                                   |
| AF025292         | Putative high-affinity potassium transporter                | AF035820         | Gibberellin action negative regulator SPY        |
| D10057           | Dioxygenase gene expressed under iron deficiency conditions | AF023472         | Peptide transporter                              |
| U54767           | Caffeic acid o-methyltransferase                            |                  |                                                  |

Table S1. Continued

*Z. mays* sequences included in the analysis

| GenBank<br>acc. no. | description                                      | GenBank<br>acc. no. | description                                                   |
|---------------------|--------------------------------------------------|---------------------|---------------------------------------------------------------|
| AF073329            | Translation initiation factor 3 large subunit    | U39958              | NADP-malic enzyme root isoform                                |
| AF153448            | Nitrate reductase                                | U33816              | Beta-D-glucosidase                                            |
| AF003551            | Lysine-ketoglutarate reductase/saccharopine      | AF045473            | Histone deacetylase                                           |
| AF126054            | Small GTP binding protein                        | AF082347            | C13 endopeptidase NP1 precursor                               |
| AF143447            | Rough sheath 2                                   | U90944              | PDI-like protein                                              |
| AF133840            | Heat shock protein HSP101                        | AF050129            | Cell wall invertase                                           |
| AF142322            | Putative transcription repressor protein         | AF047490            | Zeta-carotene desaturase precursor                            |
| AF079429            | RAD51 homolog RAD51B                             | AF084478            | Rubisco activase precursor                                    |
| AF145756            | THA9                                             | U83625              | Protein kinase                                                |
| AF143681            | Cell cycle checkpoint protein MAD2 homolog       | AF093627            | Poly(ADP)-ribose polymerase                                   |
| AF131201            | Plasma membrane MIP protein                      | AF063865            | Tapetum specific protein                                      |
| AF073522            | Chloroplast protein crp1                         | AF072326            | Endo-1,3-1,4-beta-D-glucanase                                 |
| AF031083            | Aluminum-induced protein                         | AF038585            | Pyruvate dehydrogenase kinase isoform 1                       |
| AF104924            | Unconventional myosin heavy chain                | AF055898            | Aminotransferase                                              |
| AF126742            | Bundle sheath defective protein 2                | U89341              | Phosphoglucomutase 1                                          |
| AF064707            | Exohydrolase II                                  | U85494              | LON1 protease                                                 |
| AF127021            | T7-like RNA polymerase                           | U58209              | Lumenal binding protein                                       |
| AF016305            | ATP sulfurylase                                  | U50064              | Type A-like cyclin                                            |
| AB016810            | Ferredoxin                                       | U35063              | Opaque-2 heterodimerizing protein                             |
| AB021175            | Root cap protein 1                               | U57002              | P protein                                                     |
| AB004882            | Response regulator homolog                       | U33318              | Sulfur starvation induced isoflavone reductase-like enzyme    |
| AB018589            | Seedling Leaf sheath protein                     | U32579              | Protein involved in an early step in gibberellin biosynthesis |
| AB016802            | Kinase                                           | U31541              | High-methionine zein                                          |
| AB014475            | Root cap-specific glycine-rich protein           | U29159              | Ubiquitin                                                     |
| AF100455            | Knotted class 1 homeodomain protein liguleless3  | AF047852            | Terminal ear1                                                 |
| AF069911            | Pyruvate dehydrogenase E1 alpha subunit          | L05934              | Catalase                                                      |
| AF069908            | Pyruvate dehydrogenase E1 beta subunit isoform 1 | AF037061            | Tonoplast intrinsic protein                                   |
| AF111029            | 40S ribosomal protein S27 homolog                | AF019297            | Starch synthase isoform                                       |
| AF044603            | Cytokinin oxidase                                | AF080567            | Pullulanase-type starch debranching enzyme                    |
| AF077372            | Cytochrome b5 reductase                          | U62748              | Acidic ribosomal protein                                      |
| AF068119            | Beta-amylase                                     | U87949              | Proliferating cell nuclear antigen                            |

Table S2. Codon usage in sampled sequences

| <i>A. thaliana</i> (28,951 codons) |         |         |         |         |         |         |         | <i>B. napus</i> (28,232 codons) |         |         |         |         |         |         |         | <i>L. esculentum</i> (31,872 codons) |         |         |         |         |         |         |         |         |         |     |      |     |      |     |      |
|------------------------------------|---------|---------|---------|---------|---------|---------|---------|---------------------------------|---------|---------|---------|---------|---------|---------|---------|--------------------------------------|---------|---------|---------|---------|---------|---------|---------|---------|---------|-----|------|-----|------|-----|------|
| Codon %                            | Codon % | Codon % | Codon % | Codon % | Codon % | Codon % | Codon % | Codon %                         | Codon % | Codon % | Codon % | Codon % | Codon % | Codon % | Codon % | Codon %                              | Codon % | Codon % | Codon % | Codon % | Codon % | Codon % | Codon % | Codon % | Codon % |     |      |     |      |     |      |
| UUU                                | 21.9    | UCU     | 23.5    | UAU     | 13.5    | UGU     | 8.5     | UUU                             | 16.2    | UCU     | 17.6    | UAU     | 12.6    | UGU     | 8.1     | UUU                                  | 27.0    | UCU     | 21.5    | UAU     | 19.3    | UGU     | 11.2    | UUU     | 27.0    | UCU | 21.5 | UAU | 19.3 | UGU | 11.2 |
| UUC                                | 21.7    | UCC     | 10.7    | UAC     | 13.1    | UGC     | 5.9     | UUC                             | 26.3    | UCC     | 12.7    | UAC     | 20.5    | UGC     | 8.9     | UUC                                  | 15.8    | UCC     | 9.4     | UAC     | 12.4    | UGC     | 7.3     | UUC     | 15.8    | UCC | 9.4  | UAC | 12.4 | UGC | 7.3  |
| UUA                                | 12.8    | UCA     | 18.2    | UAA     | -       | UGA     | -       | UUA                             | 8.7     | UCA     | 14.6    | UAA     | -       | UGA     | -       | UUA                                  | 15.5    | UCA     | 20.6    | UAA     | -       | UGA     | -       | UUA     | 15.5    | UCA | 20.6 | UAA | -    | UGA | -    |
| UUG                                | 19.7    | UCG     | 8.5     | UAG     | -       | UGG     | 11.7    | UUG                             | 17.9    | UCG     | 7.7     | UAG     | -       | UGG     | 12.1    | UUG                                  | 27.3    | UCG     | 5.3     | UAG     | -       | UGG     | 13.1    | UUG     | 27.3    | UCG | 5.3  | UAG | -    | UGG | 13.1 |
| CUU                                | 24.9    | CCU     | 20.9    | CAU     | 13.0    | CGU     | 8.9     | CUU                             | 22.2    | CCU     | 18.9    | CAU     | 11.7    | CGU     | 9.8     | CUU                                  | 27.4    | CCU     | 18.2    | CAU     | 15.8    | CGU     | 6.8     | CUU     | 27.4    | CCU | 18.2 | CAU | 15.8 | CGU | 6.8  |
| CUC                                | 15.5    | CCC     | 5.7     | CAC     | 9.1     | CGC     | 3.5     | CUC                             | 19.9    | CCC     | 7.5     | CAC     | 11.5    | CGC     | 4.2     | CUC                                  | 12.4    | CCC     | 4.7     | CAC     | 7.4     | CGC     | 3.3     | CUC     | 12.4    | CCC | 4.7  | CAC | 7.4  | CGC | 3.3  |
| CUA                                | 9.6     | CCA     | 18.4    | CAA     | 18.4    | CGA     | 5.6     | CUA                             | 10.2    | CCA     | 14.6    | CAA     | 16.8    | CGA     | 4.1     | CUA                                  | 12.0    | CCA     | 15.8    | CAA     | 21.3    | CGA     | 5.0     | CUA     | 12.0    | CCA | 15.8 | CAA | 21.3 | CGA | 5.0  |
| CUG                                | 9.6     | CCG     | 7.6     | CAG     | 15.1    | CGG     | 4.9     | CUG                             | 10.6    | CCG     | 8.3     | CAG     | 17.1    | CGG     | 4.1     | CUG                                  | 11.3    | CCG     | 3.9     | CAG     | 13.7    | CGG     | 3.0     | CUG     | 11.3    | CCG | 3.9  | CAG | 13.7 | CGG | 3.0  |
| AUU                                | 21.3    | ACU     | 19.2    | AAU     | 21.8    | AGU     | 12.5    | AUU                             | 18.1    | ACU     | 16.9    | AAU     | 15.5    | AGU     | 11.5    | AUU                                  | 30.5    | ACU     | 20.6    | AAU     | 31.8    | AGU     | 15.4    | AUU     | 30.5    | ACU | 20.6 | AAU | 31.8 | AGU | 15.4 |
| AUC                                | 18.7    | ACC     | 9.2     | AAC     | 19.2    | AGC     | 11.2    | AUC                             | 22.1    | ACC     | 15.8    | AAC     | 30.2    | AGC     | 12.2    | AUC                                  | 14.5    | ACC     | 7.2     | AAC     | 18.1    | AGC     | 9.6     | AUC     | 14.5    | ACC | 7.2  | AAC | 18.1 | AGC | 9.6  |
| AUA                                | 13.2    | ACA     | 16.3    | AAA     | 28.9    | AGA     | 19.9    | AUA                             | 11.1    | ACA     | 13.9    | AAA     | 25.4    | AGA     | 16.2    | AUA                                  | 15.3    | ACA     | 18.5    | AAA     | 30.5    | AGA     | 16.0    | AUA     | 15.3    | ACA | 18.5 | AAA | 30.5 | AGA | 16.0 |
| AUG                                | 25.0    | ACG     | 6.7     | AAG     | 30.9    | AGG     | 11.3    | AUG                             | 24.7    | ACG     | 10.0    | AAG     | 35.2    | AGG     | 11.1    | AUG                                  | 25.1    | ACG     | 5.0     | AAG     | 29.0    | AGG     | 11.5    | AUG     | 25.1    | ACG | 5.0  | AAG | 29.0 | AGG | 11.5 |
| GUU                                | 30.2    | GCU     | 33.0    | GAU     | 36.4    | GGU     | 22.3    | GUU                             | 22.9    | GCU     | 30.1    | GAU     | 30.1    | GGU     | 24.5    | GUU                                  | 28.6    | GCU     | 30.2    | GAU     | 40.3    | GGU     | 23.4    | GUU     | 28.6    | GCU | 30.2 | GAU | 40.3 | GGU | 23.4 |
| GUC                                | 13.4    | GCC     | 11.4    | GAC     | 15.3    | GGC     | 9.7     | GUC                             | 18.0    | GCC     | 17.0    | GAC     | 25.4    | GGC     | 12.5    | GUC                                  | 10.1    | GCC     | 9.1     | GAC     | 14.5    | GGC     | 10.9    | GUC     | 10.1    | GCC | 9.1  | GAC | 14.5 | GGC | 10.9 |
| GUA                                | 10.3    | GCA     | 19.8    | GAA     | 34.0    | GGA     | 25.6    | GUA                             | 7.1     | GCA     | 15.8    | GAA     | 25.1    | GGA     | 27.7    | GUA                                  | 11.2    | GCA     | 20.6    | GAA     | 34.5    | GGA     | 23.8    | GUA     | 11.2    | GCA | 20.6 | GAA | 34.5 | GGA | 23.8 |
| GUG                                | 18.9    | GCG     | 8.3     | GAG     | 32.3    | GGG     | 10.9    | GUG                             | 19.2    | GCG     | 9.8     | GAG     | 35.9    | GGG     | 10.6    | GUG                                  | 15.0    | GCG     | 4.8     | GAG     | 24.6    | GGG     | 10.3    | GUG     | 15.0    | GCG | 4.8  | GAG | 24.6 | GGG | 10.3 |

  

| <i>N. tabacum</i> (26,805 codons) |         |         |         |         |         |         |         | <i>P. sativum</i> (30,728 codons) |         |         |         |         |         |         |         | <i>G. max</i> (32,312 codons) |         |         |         |         |         |         |         |         |         |         |         |         |         |         |         |
|-----------------------------------|---------|---------|---------|---------|---------|---------|---------|-----------------------------------|---------|---------|---------|---------|---------|---------|---------|-------------------------------|---------|---------|---------|---------|---------|---------|---------|---------|---------|---------|---------|---------|---------|---------|---------|
| Codon %                           | Codon % | Codon % | Codon % | Codon % | Codon % | Codon % | Codon % | Codon %                           | Codon % | Codon % | Codon % | Codon % | Codon % | Codon % | Codon % | Codon %                       | Codon % | Codon % | Codon % | Codon % | Codon % | Codon % | Codon % | Codon % | Codon % | Codon % | Codon % | Codon % | Codon % | Codon % | Codon % |
| UUU                               | 23.1    | UCU     | 20.9    | UAU     | 18.6    | UGU     | 9.6     | UUU                               | 23.1    | UCU     | 23.2    | UAU     | 17.8    | UGU     | 9.7     | UUU                           | 21.4    | UCU     | 17.9    | UAU     | 15.4    | UGU     | 7.8     | UUU     | 21.4    | UCU     | 17.9    | UAU     | 15.4    | UGU     | 7.8     |
| UUC                               | 17.3    | UCC     | 9.9     | UAC     | 12.6    | UGC     | 7.1     | UUC                               | 18.0    | UCC     | 10.4    | UAC     | 11.7    | UGC     | 5.7     | UUC                           | 19.1    | UCC     | 9.3     | UAC     | 14.3    | UGC     | 8.0     | UUC     | 19.1    | UCC     | 9.3     | UAC     | 14.3    | UGC     | 8.0     |
| UUA                               | 13.2    | UCA     | 18.0    | UAA     | -       | UGA     | -       | UUA                               | 13.6    | UCA     | 18.0    | UAA     | -       | UGA     | -       | UUA                           | 7.9     | UCA     | 14.4    | UAA     | -       | UGA     | -       | UUA     | 7.9     | UCA     | 14.4    | UAA     | -       | UGA     | -       |
| UUG                               | 21.5    | UCG     | 5.3     | UAG     | -       | UGG     | 11.7    | UUG                               | 22.2    | UCG     | 3.7     | UAG     | -       | UGG     | 13.4    | UUG                           | 23.5    | UCG     | 3.9     | UAG     | -       | UGG     | 11.0    | UUG     | 23.5    | UCG     | 3.9     | UAG     | -       | UGG     | 11.0    |
| CUU                               | 23.4    | CCU     | 19.2    | CAU     | 13.6    | CGU     | 7.9     | CUU                               | 26.6    | CCU     | 18.9    | CAU     | 14.4    | CGU     | 8.6     | CUU                           | 24.7    | CCU     | 18.8    | CAU     | 13.4    | CGU     | 8.7     | CUU     | 24.7    | CCU     | 18.8    | CAU     | 13.4    | CGU     | 8.7     |
| CUC                               | 13.1    | CCC     | 6.1     | CAC     | 8.1     | CGC     | 3.6     | CUC                               | 13.7    | CCC     | 6.5     | CAC     | 9.3     | CGC     | 3.7     | CUC                           | 15.0    | CCC     | 8.5     | CAC     | 10.4    | CGC     | 6.6     | CUC     | 15.0    | CCC     | 8.5     | CAC     | 10.4    | CGC     | 6.6     |
| CUA                               | 9.3     | CCA     | 18.8    | CAA     | 23.3    | CGA     | 5.7     | CUA                               | 8.3     | CCA     | 17.3    | CAA     | 21.8    | CGA     | 4.3     | CUA                           | 8.7     | CCA     | 17.5    | CAA     | 20.2    | CGA     | 4.4     | CUA     | 8.7     | CCA     | 17.5    | CAA     | 20.2    | CGA     | 4.4     |
| CUG                               | 10.8    | CCG     | 6.0     | CAG     | 16.8    | CGG     | 4.3     | CUG                               | 8.0     | CCG     | 4.5     | CAG     | 12.5    | CGG     | 2.2     | CUG                           | 13.6    | CCG     | 3.3     | CAG     | 18.0    | CGG     | 2.8     | CUG     | 13.6    | CCG     | 3.3     | CAG     | 18.0    | CGG     | 2.8     |
| AUU                               | 26.0    | ACU     | 18.8    | AAU     | 29.7    | AGU     | 13.5    | AUU                               | 29.3    | ACU     | 21.0    | AAU     | 26.0    | AGU     | 14.2    | AUU                           | 28.6    | ACU     | 17.8    | AAU     | 21.5    | AGU     | 12.4    | AUU     | 28.6    | ACU     | 17.8    | AAU     | 21.5    | AGU     | 12.4    |
| AUC                               | 13.4    | ACC     | 8.0     | AAC     | 18.8    | AGC     | 9.6     | AUC                               | 15.5    | ACC     | 11.3    | AAC     | 20.1    | AGC     | 8.7     | AUC                           | 15.5    | ACC     | 12.9    | AAC     | 21.7    | AGC     | 10.6    | AUC     | 15.5    | ACC     | 12.9    | AAC     | 21.7    | AGC     | 10.6    |
| AUA                               | 13.1    | ACA     | 17.9    | AAA     | 30.7    | AGA     | 16.3    | AUA                               | 13.9    | ACA     | 18.1    | AAA     | 33.0    | AGA     | 16.0    | AUA                           | 12.1    | ACA     | 15.0    | AAA     | 25.4    | AGA     | 16.4    | AUA     | 12.1    | ACA     | 15.0    | AAA     | 25.4    | AGA     | 16.4    |
| AUG                               | 24.8    | ACG     | 4.4     | AAG     | 32.9    | AGG     | 13.1    | AUG                               | 21.6    | ACG     | 3.8     | AAG     | 34.0    | AGG     | 10.6    | AUG                           | 22.0    | ACG     | 3.3     | AAG     | 37.6    | AGG     | 14.3    | AUG     | 22.0    | ACG     | 3.3     | AAG     | 37.6    | AGG     | 14.3    |
| GUU                               | 27.8    | GCU     | 31.2    | GAU     | 36.6    | GGU     | 22.3    | GUU                               | 30.3    | GCU     | 34.0    | GAU     | 37.8    | GGU     | 26.4    | GUU                           | 29.8    | GCU     | 31.0    | GAU     | 34.8    | GGU     | 22.2    | GUU     | 29.8    | GCU     | 31.0    | GAU     | 34.8    | GGU     | 22.2    |
| GUC                               | 10.4    | GCC     | 11.7    | GAC     | 16.1    | GGC     | 11.2    | GUC                               | 11.0    | GCC     | 11.9    | GAC     | 15.9    | GGC     | 9.4     | GUC                           | 11.5    | GCC     | 16.8    | GAC     | 19.3    | GGC     | 12.2    | GUC     | 11.5    | GCC     | 16.8    | GAC     | 19.3    | GGC     | 12.2    |
| GUA                               | 12.3    | GCA     | 25.3    | GAA     | 36.7    | GGA     | 23.7    | GUA                               | 9.3     | GCA     | 23.2    | GAA     | 37.7    | GGA     | 25.0    | GUA                           | 8.0     | GCA     | 22.9    | GAA     | 36.4    | GGA     | 23.5    | GUA     | 8.0     | GCA     | 22.9    | GAA     | 36.4    | GGA     | 23.5    |
| GUG                               | 15.5    | GCG     | 6.5     | GAG     | 29.2    | GGG     | 11.3    | GUG                               | 16.2    | GCG     | 5.6     | GAG     | 27.3    | GGG     | 8.8     | GUG                           | 20.7    | GCG     | 5.9     | GAG     | 35.3    | GGG     | 11.9    | GUG     | 20.7    | GCG     | 5.9     | GAG     | 35.3    | GGG     | 11.9    |

Table S2. Continued

| <i>O. sativa</i> (29,531 codons) |         |         |         |         | <i>T. aestivum</i> (26,670 codons) |         |         |         |         | <i>H. vulgare</i> (26,561 codons) |         |         |         |         |      |     |      |     |      |     |      |     |      |
|----------------------------------|---------|---------|---------|---------|------------------------------------|---------|---------|---------|---------|-----------------------------------|---------|---------|---------|---------|------|-----|------|-----|------|-----|------|-----|------|
| Codon %                          | Codon % | Codon % | Codon % | Codon % | Codon %                            | Codon % | Codon % | Codon % | Codon % | Codon %                           | Codon % | Codon % | Codon % | Codon % |      |     |      |     |      |     |      |     |      |
| UUU                              | 13.7    | UCU     | 11.0    | UAU     | 11.3                               | UGU     | 5.6     | UUU     | 12.0    | UCU                               | 10.8    | UAU     | 9.7     | UGU     | 4.9  | UUU | 8.1  | UCU | 6.7  | UAU | 6.4  | UGU | 3.6  |
| UUC                              | 23.8    | UCC     | 14.2    | UAC     | 17.7                               | UGC     | 13.1    | UUC     | 28.8    | UCC                               | 18.6    | UAC     | 23.4    | UGC     | 12.7 | UUC | 33.0 | UCC | 18.7 | UAC | 25.9 | UGC | 13.0 |
| UUA                              | 5.6     | UCA     | 10.9    | UAA     | -                                  | UGA     | -       | UUA     | 2.9     | UCA                               | 10.0    | UAA     | -       | UGA     | -    | UUA | 1.5  | UCA | 6.4  | UAA | -    | UGA | -    |
| UUG                              | 14.6    | UCG     | 7.8     | UAG     | -                                  | UGG     | 11.3    | UUG     | 9.4     | UCG                               | 8.7     | UAG     | -       | UGG     | 12.3 | UUG | 8.5  | UCG | 10.8 | UAG | -    | UGG | 11.7 |
| CUU                              | 19.5    | CCU     | 12.9    | CAU     | 10.8                               | CGU     | 6.9     | CUU     | 12.1    | CCU                               | 11.7    | CAU     | 8.2     | CGU     | 4.6  | CUU | 10.6 | CCU | 9.9  | CAU | 6.2  | CGU | 5.5  |
| CUC                              | 23.8    | CCC     | 11.2    | CAC     | 12.0                               | CGC     | 12.8    | CUC     | 27.7    | CCC                               | 15.0    | CAC     | 16.3    | CGC     | 14.6 | CUC | 33.8 | CCC | 15.0 | CAC | 15.8 | CGC | 14.9 |
| CUA                              | 7.6     | CCA     | 13.4    | CAA     | 11.3                               | CGA     | 4.1     | CUA     | 4.4     | CCA                               | 15.6    | CAA     | 18.6    | CGA     | 2.8  | CUA | 3.8  | CCA | 11.0 | CAA | 10.4 | CGA | 2.3  |
| CUG                              | 20.6    | CCG     | 12.7    | CAG     | 19.6                               | CGG     | 7.6     | CUG     | 21.7    | CCG                               | 16.2    | CAG     | 31.0    | CGG     | 8.5  | CUG | 24.5 | CCG | 16.9 | CAG | 28.8 | CGG | 9.8  |
| AUU                              | 17.8    | ACU     | 12.5    | AAU     | 14.0                               | AGU     | 7.9     | AUU     | 9.8     | ACU                               | 8.6     | AAU     | 10.7    | AGU     | 5.5  | AUU | 10.7 | ACU | 8.4  | AAU | 8.6  | AGU | 4.1  |
| AUC                              | 22.8    | ACC     | 15.6    | AAC     | 24.1                               | AGC     | 15.5    | AUC     | 27.4    | ACC                               | 20.8    | AAC     | 26.1    | AGC     | 15.9 | AUC | 32.6 | ACC | 26.3 | AAC | 29.6 | AGC | 17.4 |
| AUA                              | 8.8     | ACA     | 12.0    | AAA     | 17.9                               | AGA     | 7.4     | AUA     | 5.1     | ACA                               | 7.9     | AAA     | 11.1    | AGA     | 5.5  | AUA | 5.6  | ACA | 7.0  | AAA | 9.1  | AGA | 4.1  |
| AUG                              | 25.9    | ACG     | 8.9     | AAG     | 42.2                               | AGG     | 14.5    | AUG     | 27.3    | ACG                               | 11.3    | AAG     | 42.4    | AGG     | 12.9 | AUG | 24.5 | ACG | 12.2 | AAG | 43.8 | AGG | 11.8 |
| GUU                              | 19.6    | GCU     | 25.3    | GAU     | 25.5                               | GGU     | 17.9    | GUU     | 13.2    | GCU                               | 16.2    | GAU     | 17.8    | GGU     | 13.8 | GUU | 12.5 | GCU | 15.7 | GAU | 13.8 | GGU | 13.9 |
| GUC                              | 21.0    | GCC     | 29.9    | GAC     | 27.4                               | GGC     | 26.7    | GUC     | 24.3    | GCC                               | 38.0    | GAC     | 35.8    | GGC     | 39.4 | GUC | 28.8 | GCC | 42.0 | GAC | 37.8 | GGC | 42.0 |
| GUA                              | 6.8     | GCA     | 19.6    | GAA     | 23.1                               | GGA     | 17.1    | GUA     | 5.1     | GCA                               | 13.2    | GAA     | 14.5    | GGA     | 13.5 | GUA | 3.7  | GCA | 14.3 | GAA | 11.5 | GGA | 13.4 |
| GUG                              | 24.2    | GCG     | 19.9    | GAG     | 41.9                               | GGG     | 16.4    | GUG     | 26.8    | GCG                               | 23.3    | GAG     | 41.4    | GGG     | 18.9 | GUG | 31.5 | GCG | 23.6 | GAG | 43.6 | GGG | 19.6 |

  

| <i>Z. mays</i> (29,807 codons) |         |         |         |         |      |     |      |
|--------------------------------|---------|---------|---------|---------|------|-----|------|
| Codon %                        | Codon % | Codon % | Codon % | Codon % |      |     |      |
| UUU                            | 11.8    | UCU     | 11.8    | UAU     | 10.2 | UGU | 4.6  |
| UUC                            | 24.4    | UCC     | 14.5    | UAC     | 20.8 | UGC | 9.3  |
| UUA                            | 5.2     | UCA     | 10.6    | UAA     | -    | UGA | -    |
| UUG                            | 12.5    | UCG     | 10.5    | UAG     | -    | UGG | 11.8 |
| CUU                            | 16.5    | CCU     | 13.2    | CAU     | 9.1  | CGU | 6.2  |
| CUC                            | 23.9    | CCC     | 12.9    | CAC     | 13.7 | CGC | 15.2 |
| CUA                            | 5.4     | CCA     | 13.0    | CAA     | 10.7 | CGA | 3.6  |
| CUG                            | 26.7    | CCG     | 15.6    | CAG     | 25.1 | CGG | 10.0 |
| AUU                            | 13.5    | ACU     | 10.4    | AAU     | 13.1 | AGU | 7.5  |
| AUC                            | 26.5    | ACC     | 15.9    | AAC     | 21.7 | AGC | 16.0 |
| AUA                            | 7.4     | ACA     | 10.4    | AAA     | 14.3 | AGA | 8.9  |
| AUG                            | 25.5    | ACG     | 10.4    | AAG     | 41.4 | AGG | 15.5 |
| GUU                            | 15.7    | GCU     | 24.4    | GAU     | 23.1 | GGU | 16.2 |
| GUC                            | 20.2    | GCC     | 28.6    | GAC     | 34.2 | GGC | 28.3 |
| GUA                            | 6.2     | GCA     | 16.9    | GAA     | 21.6 | GGA | 15.2 |
| GUG                            | 26.7    | GCG     | 24.4    | GAG     | 42.8 | GGG | 16.4 |

‰: frequency of occurrence (per thousand) for each codon in the sample.

--: not determined (STOP codons).

Table S3. Relative frequency (%) of each codon when the subsequent triplet was headed by A, G, C or T

| Aminoacid | Codon position |      | Organism           |                 |                      |                   |                   |               |                  |                    |                   |                |        |
|-----------|----------------|------|--------------------|-----------------|----------------------|-------------------|-------------------|---------------|------------------|--------------------|-------------------|----------------|--------|
|           | 1,2,3          | 4    | <i>A. thaliana</i> | <i>B. napus</i> | <i>L. esculentum</i> | <i>N. tabacum</i> | <i>P. sativum</i> | <i>G. max</i> | <i>O. sativa</i> | <i>T. aestivum</i> | <i>H. vulgare</i> | <i>Z. mays</i> |        |
| Lys       | AAA            | A    | 25.7 ↓             | 21.3 ↓          | 26.5                 | 26.9              | 29.1              | 26.1          | 25.0             | 22.0               | 23.0              | 29.4           |        |
|           |                | G    | 39.1 ↑             | 41.8 ↑          | 38.1 ↑               | 37.9              | 37.8              | 37.6          | 36.1             | 33.6               | 42.0              | 40.5           |        |
|           |                | C    | 18.5               | 22.6            | 15.2                 | 15.8 ↓            | 17.8              | 17.9          | 15.1             | 21.0               | 14.4 ↓            | 15.5           |        |
|           | AAG            | A    | 37.0 ↑             | 37.2 ↑          | 34.1 ↑               | 34.3              | 34.6              | 31.3          | 32.2             | 29.3               | 28.5              | 29.5           |        |
|           |                | G    | 26.8 ↓             | 26.5 ↓          | 29.1 ↓               | 28.5 ↓            | 33.0              | 33.4          | 34.9             | 35.4               | 35.7              | 34.6           |        |
|           |                | C    | 21.0               | 20.6            | 20.1                 | 22.5              | 17.6              | 21.3          | 20.4             | 19.7               | 23.6              | 21.8           |        |
|           | T              | 15.1 | 15.7               | 16.7            | 14.6                 | 14.7              | 14.0              | 12.5 ↓        | 15.6             | 12.3               | 14.1              |                |        |
|           | Asn            | AAC  | A                  | 38.6 ↑          | 35.6 ↑               | 42.3 ↑            | 37.6 ↑            | 43.8 ↑        | 42.2 ↑           | 37.1 ↑             | 28.3              | 28.8 ↑         | 32.0 ↑ |
|           |                |      | G                  | 21.5 ↓          | 25.2 ↓               | 13.2 ↓            | 15.6 ↓            | 14.9 ↓        | 11.5 ↓           | 20.5               | 27.7 ↓            | 29.3 ↓         | 23.5 ↓ |
| C         |                |      | 18.5               | 21.4            | 15.9                 | 21.4              | 20.1              | 25.4          | 23.9             | 24.1               | 22.6              | 23.5           |        |
| AAT       |                | A    | 17.2 ↓             | 21.0 ↓          | 22.4 ↓               | 17.2 ↓            | 20.4 ↓            | 16.3 ↓        | 18.7 ↓           | 17.2 ↓             | 14.0 ↓            | 17.2 ↓         |        |
|           |                | G    | 43.5 ↑             | 43.3 ↑          | 38.1 ↑               | 42.9 ↑            | 43.7 ↑            | 46.1 ↑        | 50.2 ↑           | 49.8 ↑             | 53.3 ↑            | 50.8 ↑         |        |
|           |                | C    | 24.2               | 22.6            | 20.2                 | 21.3              | 17.5              | 18.2          | 18.0             | 17.9               | 21.4              | 17.4           |        |
|           | T              | 15.0 | 13.2               | 19.2            | 18.6                 | 18.3              | 19.5              | 13.1          | 15.1             | 11.4 ↓             | 14.6              |                |        |
|           | Glu            | GAA  | A                  | 23.6 ↓          | 22.2 ↓               | 29.9              | 30.8              | 30.0          | 27.2 ↓           | 25.7               | 22.7              | 15.4 ↓         | 26.7   |
|           |                |      | G                  | 48.4 ↑          | 49.0 ↑               | 35.8              | 38.5 ↑            | 41.4 ↑        | 42.2 ↑           | 43.3               | 38.8              | 50.8 ↑         | 43.2   |
| C         |                |      | 15.3               | 15.4            | 16.3                 | 16.5              | 14.4              | 16.1          | 15.3             | 18.9               | 17.7              | 18.2           |        |
| GAG       |                | A    | 39.1 ↑             | 38.6 ↑          | 37.1                 | 37.0              | 34.4              | 35.5 ↑        | 29.1             | 29.5               | 27.0              | 29.4           |        |
|           |                | G    | 25.6 ↓             | 25.0 ↓          | 30.2                 | 25.2 ↓            | 30.5 ↓            | 31.1 ↓        | 37.9             | 34.3               | 37.8              | 35.8           |        |
|           |                | C    | 17.8               | 18.7            | 15.9                 | 21.8              | 14.9              | 16.0          | 18.7             | 21.7               | 21.8              | 22.2           |        |
|           | T              | 17.4 | 17.8               | 16.8            | 16.0                 | 20.2 ↑            | 17.4              | 14.2          | 14.6             | 13.4               | 12.6              |                |        |
|           | Asp            | GAC  | A                  | 33.3 ↑          | 30.1 ↑               | 42.0 ↑            | 34.6 ↑            | 43.2 ↑        | 43.8 ↑           | 34.2 ↑             | 27.1 ↑            | 29.6 ↑         | 30.8 ↑ |
|           |                |      | G                  | 25.0 ↓          | 30.3 ↓               | 15.4 ↓            | 23.2 ↓            | 16.2 ↓        | 16.2 ↓           | 29.5 ↓             | 32.7 ↓            | 32.8 ↓         | 31.9 ↓ |
| C         |                |      | 20.7               | 18.3            | 16.7                 | 18.1              | 20.5              | 20.8          | 20.5             | 22.4               | 22.1              | 22.2           |        |
| GAT       |                | A    | 20.3 ↓             | 18.1 ↓          | 20.8 ↓               | 20.4 ↓            | 22.5 ↓            | 18.9 ↓        | 15.4 ↓           | 15.6 ↓             | 16.9 ↓            | 19.8 ↓         |        |
|           |                | G    | 41.8 ↑             | 46.0 ↑          | 40.6 ↑               | 43.2 ↑            | 42.4 ↑            | 45.3 ↑        | 48.8 ↑           | 50.0 ↑             | 52.3 ↑            | 46.7 ↑         |        |
|           |                | C    | 19.5               | 20.7            | 18.7                 | 18.8              | 18.1              | 18.8          | 21.1             | 18.8               | 18.5              | 18.6           |        |
|           | T              | 18.4 | 15.2               | 19.9            | 17.7                 | 17.0              | 16.9              | 14.6          | 15.6             | 12.3               | 15.0              |                |        |
|           | Gln            | CAA  | A                  | 26.1            | 24.9                 | 27.7              | 27.5              | 27.3          | 26.5             | 23.1               | 13.9 ↓            | 23.6           | 29.6   |
|           |                |      | G                  | 40.0 ↑          | 46.2 ↑               | 34.5              | 32.0              | 39.3          | 37.9 ↑           | 39.5               | 22.6              | 44.0 ↑         | 33.3   |
| C         |                |      | 19.5               | 19.4            | 18.3                 | 23.2              | 17.9              | 21.9          | 22.2             | 52.8 ↑             | 22.2              | 23.0           |        |
| CAG       |                | A    | 32.5               | 34.6            | 34.6                 | 34.2              | 35.0              | 35.1 ↑        | 27.9             | 21.7               | 23.9              | 23.7           |        |
|           |                | G    | 21.1 ↓             | 20.1 ↓          | 24.5 ↓               | 23.8              | 26.9              | 25.1 ↓        | 29.0             | 27.5               | 31.7              | 34.4           |        |
|           |                | C    | 27.9               | 24.1            | 20.6                 | 24.4              | 21.4              | 24.7          | 25.7             | 37.7 ↓             | 28.5              | 27.8           |        |
|           | T              | 18.5 | 21.2 ↑             | 20.2            | 17.6                 | 16.7              | 15.1              | 17.4          | 13.0             | 15.9               | 14.1              |                |        |
|           | His            | CAC  | A                  | 36.0 ↑          | 29.9 ↑               | 42.4 ↑            | 44.9 ↑            | 38.8 ↑        | 33.4 ↑           | 28.6               | 23.6              | 23.6           | 23.2   |
|           |                |      | G                  | 22.0 ↓          | 31.2 ↓               | 10.2 ↓            | 17.1 ↓            | 14.7 ↓        | 16.7 ↓           | 22.7 ↓             | 30.0 ↓            | 28.3 ↓         | 24.9 ↓ |
| C         |                |      | 20.1               | 19.1            | 25.0                 | 20.4              | 24.8              | 26.0          | 29.2             | 28.4               | 29.8              | 32.0 ↑         |        |
| CAT       |                | A    | 18.0 ↓             | 15.1 ↓          | 19.3 ↓               | 15.9 ↓            | 20.0 ↓            | 15.0 ↓        | 18.2             | 14.1               | 12.7              | 16.6           |        |
|           |                | G    | 40.1 ↑             | 36.3            | 40.4 ↑               | 38.2 ↑            | 39.5 ↑            | 43.3 ↑        | 48.3 ↑           | 48.6 ↑             | 55.8 ↑            | 46.9 ↑         |        |
|           |                | C    | 24.1               | 24.2            | 22.5                 | 23.1              | 21.1              | 21.8          | 22.6             | 18.6               | 20.0              | 18.8           |        |
|           | T              | 17.8 | 24.5               | 17.9            | 22.8                 | 19.5              | 19.9              | 11.0          | 18.6             | 11.5               | 17.7              |                |        |
|           | Tyr            | TAC  | A                  | 39.2 ↑          | 36.5 ↑               | 43.9 ↑            | 38.3 ↑            | 40.6 ↑        | 42.1 ↑           | 36.8 ↑             | 26.3 ↑            | 28.1           | 38.4 ↑ |
|           |                |      | G                  | 21.3 ↓          | 26.5 ↓               | 14.0 ↓            | 16.2 ↓            | 16.4 ↓        | 12.4 ↓           | 23.0               | 28.8              | 28.8 ↓         | 22.8   |
| C         |                |      | 18.2               | 14.4            | 20.1                 | 20.6              | 20.8              | 19.5          | 21.1             | 24.0               | 23.4              | 22.8           |        |
| TAT       |                | A    | 18.5 ↓             | 16.6 ↓          | 23.9 ↓               | 19.4 ↓            | 18.8 ↓            | 14.9 ↓        | 10.2 ↓           | 11.9 ↓             | 14.2 ↓            | 18.5 ↓         |        |
|           |                | G    | 44.6 ↑             | 41.3 ↑          | 35.1 ↑               | 44.3 ↑            | 43.6 ↑            | 50.5 ↑        | 56.0 ↑           | 49.2 ↑             | 60.4 ↑            | 52.8 ↑         |        |
|           |                | C    | 20.0               | 23.6 ↑          | 19.5                 | 16.0              | 19.3              | 18.5          | 19.8             | 21.5               | 16.0              | 16.8           |        |
|           | T              | 16.9 | 18.5               | 21.6            | 20.2                 | 18.2              | 16.1 ↓            | 14.1          | 17.3             | 9.5                | 11.9              |                |        |

Table S3. Continued

|     |     |      |      |      |      |      |      |      |      |      |      |      |      |      |      |      |      |      |      |      |      |   |
|-----|-----|------|------|------|------|------|------|------|------|------|------|------|------|------|------|------|------|------|------|------|------|---|
| Cys | TGC | A    | 43.0 | ↑    | 38.4 | 39.7 | ↑    | 47.1 | ↑    | 41.1 | ↑    | 44.0 | ↑    | 32.4 | 31.6 | 27.9 | 29.3 |      |      |      |      |   |
|     |     | G    | 17.4 | ↓    | 22.0 | ↓    | 11.2 | ↓    | 10.1 | ↓    | 14.3 | ↓    | 9.3  | ↓    | 21.5 | ↓    | 24.8 | ↓    | 27.9 | ↓    | 19.6 | ↓ |
|     |     | C    | 9.3  | ↓    | 18.4 |      | 22.4 |      | 22.2 |      | 16.6 |      | 26.5 |      | 23.6 |      | 23.0 |      | 25.0 |      | 30.4 | ↑ |
|     |     | T    | 30.2 |      | 21.2 |      | 26.7 |      | 20.6 |      | 28.0 |      | 20.2 |      | 22.5 |      | 20.6 |      | 19.2 |      | 20.7 |   |
|     | TGT | A    | 20.4 | ↓    | 30.0 |      | 20.7 | ↓    | 20.9 | ↓    | 17.8 | ↓    | 9.5  | ↓    | 12.1 | ↓    | 13.6 | ↓    | 14.7 |      | 19.1 |   |
|     |     | G    | 39.6 | ↑    | 38.3 | ↑    | 41.5 | ↑    | 42.6 | ↑    | 38.4 | ↑    | 59.1 | ↑    | 60.0 | ↑    | 56.8 | ↑    | 65.3 | ↑    | 53.7 | ↑ |
|     | C   | A    | 22.4 |      | 14.3 |      | 15.4 |      | 20.9 |      | 19.2 |      | 17.9 |      | 13.3 |      | 15.9 |      | 9.5  | ↓    | 11.8 | ↓ |
|     |     | T    | 17.6 |      | 17.4 |      | 22.4 |      | 15.5 |      | 24.6 |      | 13.5 |      | 14.5 |      | 13.6 |      | 10.5 |      | 15.4 |   |
| Phe | TTC | A    | 35.1 | ↑    | 30.4 | 39.4 | ↑    | 39.9 | ↑    | 39.2 | ↑    | 37.7 | ↑    | 29.5 | ↑    | 28.1 | ↑    | 29.9 |      | 28.0 | ↑    |   |
|     |     | G    | 19.2 | ↓    | 22.7 | ↓    | 12.3 | ↓    | 11.4 | ↓    | 11.2 | ↓    | 13.4 | ↓    | 24.1 | ↓    | 25.5 | ↓    | 30.2 | ↓    | 28.6 | ↓ |
|     |     | C    | 18.1 |      | 20.5 |      | 21.2 |      | 22.6 |      | 23.3 |      | 24.6 |      | 25.1 |      | 23.3 |      | 22.9 |      | 22.3 |   |
|     |     | T    | 27.5 | ↑    | 26.4 |      | 27.1 | ↑    | 26.1 | ↑    | 26.4 | ↑    | 24.3 | ↑    | 21.2 |      | 23.1 |      | 17.0 |      | 21.2 |   |
|     | TTT | A    | 19.0 | ↓    | 20.4 | ↓    | 21.5 | ↓    | 16.8 | ↓    | 17.6 | ↓    | 13.6 | ↓    | 14.8 | ↓    | 12.5 | ↓    | 15.8 | ↓    | 15.4 | ↓ |
|     |     | G    | 46.9 | ↑    | 44.6 | ↑    | 39.4 | ↑    | 48.1 | ↑    | 46.4 | ↑    | 52.8 | ↑    | 54.6 | ↑    | 54.7 | ↑    | 60.9 | ↑    | 52.4 | ↑ |
|     | C   | A    | 16.4 |      | 18.8 |      | 19.8 |      | 17.9 |      | 18.3 |      | 17.4 |      | 18.3 |      | 15.0 |      | 8.8  | ↓    | 18.5 |   |
|     |     | T    | 17.7 | ↓    | 16.2 | ↓    | 19.3 |      | 17.3 |      | 17.7 | ↓    | 16.2 |      | 12.3 | ↓    | 17.8 |      | 14.4 |      | 13.7 |   |
| Ile | ATA | A    | 25.5 |      | 26.8 |      | 25.8 |      | 28.3 |      | 29.2 |      | 27.7 |      | 32.0 |      | 22.8 |      | 23.5 |      | 27.5 |   |
|     |     | G    | 32.3 |      | 34.4 |      | 35.8 |      | 28.6 |      | 31.5 |      | 31.3 |      | 23.6 | ↓    | 27.9 |      | 27.5 |      | 33.3 |   |
|     |     | C    | 17.8 |      | 17.2 |      | 14.5 | ↓    | 16.3 |      | 11.9 | ↓    | 12.6 | ↓    | 15.1 |      | 25.0 |      | 14.8 |      | 21.6 |   |
|     |     | T    | 24.4 |      | 21.7 |      | 23.9 |      | 26.9 | ↑    | 27.3 | ↑    | 28.5 | ↑    | 29.3 | ↑    | 24.3 |      | 34.2 | ↑    | 17.6 |   |
|     | ATC | A    | 36.3 | ↑    | 33.0 | ↑    | 40.8 | ↑    | 42.2 | ↑    | 45.5 | ↑    | 42.2 | ↑    | 36.3 | ↑    | 32.8 | ↑    | 33.3 | ↑    | 30.3 | ↑ |
|     |     | G    | 21.4 | ↓    | 25.6 | ↓    | 19.9 | ↓    | 15.4 | ↓    | 16.2 | ↓    | 17.5 | ↓    | 26.0 | ↓    | 28.9 | ↓    | 29.6 | ↓    | 27.0 | ↓ |
|     | C   | A    | 16.8 |      | 20.5 |      | 20.3 |      | 20.7 |      | 17.5 |      | 22.3 |      | 22.3 |      | 23.8 |      | 21.6 |      | 26.0 |   |
|     |     | T    | 25.5 | ↑    | 21.0 |      | 19.0 |      | 21.8 |      | 20.8 |      | 17.9 |      | 15.3 |      | 14.5 |      | 15.6 |      | 16.7 |   |
| ATT | A   | 18.3 |      | 18.8 | ↓    | 18.4 |      | 21.9 | ↓    | 20.0 | ↓    | 18.1 |      | 15.4 | ↓    | 13.0 | ↓    | 12.6 | ↓    | 18.4 | ↓    |   |
|     | G   | 41.5 | ↑    | 44.6 | ↑    | 40.0 | ↑    | 42.3 | ↑    | 43.6 | ↑    | 46.9 | ↑    | 53.9 | ↑    | 51.9 | ↑    | 57.9 | ↑    | 48.4 | ↑    |   |
|     | C   | A    | 26.1 | ↑    | 22.1 |      | 22.9 |      | 18.9 |      | 18.6 |      | 19.2 |      | 16.5 |      | 18.3 |      | 16.1 |      | 21.1 |   |
|     |     | T    | 14.1 | ↓    | 14.5 | ↓    | 18.6 |      | 16.9 | ↓    | 17.8 |      | 15.8 | ↓    | 14.2 |      | 16.8 |      | 13.3 |      | 12.2 |   |
| Thr | ACA | A    | 32.7 |      | 38.5 | ↑    | 35.5 |      | 30.8 |      | 36.8 |      | 33.5 |      | 36.0 | ↑    | 26.2 |      | 33.5 |      | 28.2 |   |
|     |     | G    | 32.9 |      | 29.3 |      | 28.0 |      | 33.5 |      | 25.4 | ↓    | 30.6 |      | 28.9 | ↓    | 35.7 |      | 28.6 |      | 29.8 |   |
|     |     | C    | 15.7 |      | 17.9 |      | 18.0 |      | 16.5 |      | 17.8 |      | 20.0 |      | 17.3 |      | 17.1 |      | 18.9 |      | 15.2 |   |
|     |     | T    | 18.7 |      | 14.3 |      | 18.5 |      | 19.2 |      | 20.0 |      | 15.9 |      | 17.8 |      | 21.0 |      | 18.9 |      | 26.9 | ↑ |
|     | ACG | A    | 32.3 |      | 25.4 |      | 31.9 |      | 33.1 |      | 19.7 |      | 25.5 |      | 22.7 |      | 16.6 | ↓    | 16.4 | ↓    | 19.9 |   |
|     |     | G    | 33.8 |      | 30.0 |      | 27.5 |      | 36.4 |      | 41.9 |      | 38.7 |      | 39.8 |      | 36.8 |      | 42.1 |      | 36.7 |   |
|     | C   | A    | 17.4 |      | 19.8 |      | 16.3 |      | 8.5  |      | 16.2 |      | 22.6 |      | 23.5 |      | 31.1 | ↑    | 23.8 | ↑    | 25.7 | ↑ |
|     |     | T    | 16.4 |      | 24.7 |      | 24.4 |      | 22.0 |      | 22.2 |      | 13.2 |      | 14.0 |      | 15.6 |      | 17.6 |      | 17.7 |   |
| ACC | A   | 37.5 | ↑    | 34.6 |      | 45.9 | ↑    | 39.7 | ↑    | 48.8 | ↑    | 43.5 | ↑    | 36.2 | ↑    | 32.6 | ↑    | 32.6 | ↑    | 31.5 | ↑    |   |
|     | G   | 27.3 |      | 36.9 |      | 16.6 | ↓    | 16.4 | ↓    | 22.5 | ↓    | 15.9 | ↓    | 30.8 | ↓    | 35.8 |      | 33.8 |      | 30.4 | ↓    |   |
|     | C   | A    | 15.4 |      | 11.9 | ↓    | 18.3 |      | 20.1 |      | 15.0 |      | 22.6 |      | 19.1 |      | 16.0 |      | 15.6 |      | 19.2 |   |
|     |     | T    | 19.9 |      | 16.6 |      | 19.2 |      | 23.8 |      | 13.6 |      | 18.0 |      | 13.9 |      | 15.6 |      | 18.0 |      | 18.8 |   |
| ACT | A   | 17.4 | ↓    | 20.5 | ↓    | 24.6 | ↓    | 20.9 | ↓    | 21.0 | ↓    | 15.5 | ↓    | 13.0 | ↓    | 18.7 |      | 15.2 | ↓    | 15.2 | ↓    |   |
|     | G   | 38.6 |      | 32.1 |      | 37.8 | ↑    | 39.4 | ↑    | 37.7 | ↑    | 45.5 | ↑    | 51.8 | ↑    | 43.9 |      | 46.4 | ↑    | 53.2 | ↑    |   |
|     | C   | A    | 25.0 | ↑    | 24.7 | ↑    | 17.9 |      | 16.9 |      | 21.4 |      | 20.5 |      | 22.5 |      | 17.8 |      | 18.8 |      | 17.7 |   |
|     |     | T    | 19.0 |      | 22.6 |      | 19.6 |      | 22.9 |      | 19.9 |      | 18.6 |      | 12.7 |      | 19.6 |      | 19.6 |      | 13.9 |   |
| Gly | GGA | A    | 33.6 |      | 35.8 | ↑    | 31.1 |      | 35.7 | ↑    | 37.5 | ↑    | 37.7 | ↑    | 32.3 |      | 28.6 |      | 25.1 |      | 24.9 |   |
|     |     | G    | 38.0 | ↑    | 38.1 |      | 31.8 |      | 33.3 |      | 32.2 |      | 36.8 |      | 36.8 |      | 33.1 |      | 35.2 |      | 38.5 |   |
|     |     | C    | 11.6 | ↓    | 14.7 |      | 15.0 |      | 12.3 | ↓    | 14.8 |      | 12.9 | ↓    | 12.3 | ↓    | 20.0 |      | 23.9 |      | 14.5 | ↓ |
|     |     | T    | 16.8 | ↓    | 11.5 | ↓    | 22.1 |      | 18.7 |      | 15.5 | ↓    | 12.6 | ↓    | 18.6 |      | 18.3 |      | 15.8 |      | 22.0 |   |
|     | GGG | A    | 44.8 | ↑    | 44.0 | ↑    | 38.2 | ↑    | 34.0 |      | 39.6 | ↑    | 34.2 |      | 36.2 | ↑    | 30.0 |      | 27.3 |      | 29.3 |   |
|     |     | G    | 15.9 | ↓    | 15.7 | ↓    | 26.0 |      | 27.7 |      | 26.7 |      | 26.9 | ↓    | 20.3 | ↓    | 23.3 | ↓    | 22.1 | ↓    | 24.0 | ↓ |
|     | C   | A    | 16.5 |      | 18.7 |      | 17.1 |      | 23.8 | ↑    | 13.3 |      | 18.5 |      | 25.1 | ↑    | 31.2 | ↑    | 28.8 | ↑    | 26.8 | ↑ |
|     |     | T    | 22.9 |      | 21.7 |      | 18.7 |      | 14.5 |      | 20.4 |      | 20.4 |      | 18.4 |      | 15.5 |      | 21.9 |      | 19.9 |   |
| GGC | A   | 33.0 |      | 34.3 |      | 39.9 | ↑    | 42.1 | ↑    | 31.8 |      | 38.7 | ↑    | 29.0 |      | 29.5 |      | 31.3 | ↑    | 32.1 | ↑    |   |
|     | G   | 27.3 |      | 25.5 | ↓    | 15.3 | ↓    | 20.7 | ↓    | 20.1 | ↓    | 17.7 | ↓    | 38.1 |      | 39.2 |      | 34.6 |      | 33.9 |      |   |
|     | C   | A    | 17.7 |      | 17.8 |      | 17.6 |      | 18.7 |      | 26.3 | ↑    | 20.5 |      | 18.1 |      | 18.9 |      | 20.4 |      | 20.6 |   |
|     |     | T    | 22.0 |      | 22.4 |      | 27.2 |      | 18.4 |      | 21.8 |      | 23.0 | ↑    | 14.7 |      | 12.5 |      | 13.6 | ↓    | 13.3 | ↓ |
| GGT | A   | 18.4 | ↓    | 19.1 | ↓    | 23.1 | ↓    | 16.0 | ↓    | 18.4 | ↓    | 15.5 | ↓    | 15.5 | ↓    | 13.6 | ↓    | 10.6 | ↓    | 12.6 | ↓    |   |
|     | G   | 37.4 |      | 40.5 | ↑    | 37.0 | ↑    | 44.7 | ↑    | 40.6 | ↑    | 48.0 | ↑    | 49.3 | ↑    | 54.5 | ↑    | 55.4 | ↑    | 53.6 | ↑    |   |
|     | C   | A    | 19.2 |      | 21.1 |      | 16.5 |      | 18.0 |      | 16.2 |      | 18.2 |      | 14.7 |      | 17.3 |      | 17.9 |      | 16.4 |   |
|     |     | T    | 25.0 |      | 19.2 |      | 23.5 |      | 21.2 |      | 24.8 | ↑    | 18.3 |      | 20.4 |      | 14.6 |      | 16.0 |      | 17.4 |   |

Table S3. Continued

|     |     |        |        |        |        |        |        |        |        |        |        |        |
|-----|-----|--------|--------|--------|--------|--------|--------|--------|--------|--------|--------|--------|
| Ala | GCA | A      | 32.9 ↑ | 30.8   | 34.2 ↑ | 31.1   | 35.2 ↑ | 33.8   | 28.0   | 27.8   | 28.1   | 30.3 ↑ |
|     |     | G      | 36.0   | 35.3   | 29.2   | 33.4   | 27.6 ↓ | 31.4   | 35.9   | 31.5 ↓ | 32.5   | 33.9 ↓ |
|     |     | C      | 14.7   | 19.1   | 17.0   | 15.8   | 18.5   | 17.7   | 19.5   | 21.9   | 22.3   | 20.2   |
|     |     | T      | 16.4 ↓ | 14.8   | 19.5   | 19.7   | 18.7   | 17.1   | 16.6   | 18.8   | 17.1   | 15.6   |
|     | GCG | A      | 33.2   | 29.9   | 31.2   | 29.5   | 32.0   | 22.5   | 22.7   | 19.3 ↓ | 15.6 ↓ | 13.8 ↓ |
|     |     | G      | 32.4   | 37.4   | 35.7   | 38.2   | 39.5   | 42.9   | 35.4   | 34.5 ↓ | 33.9   | 38.4   |
|     |     | C      | 15.8   | 12.9   | 14.9   | 15.6   | 12.8   | 15.2   | 27.4 ↑ | 31.2 ↑ | 37.2 ↑ | 31.8 ↑ |
|     |     | T      | 18.7   | 19.8   | 18.2   | 16.8   | 15.7   | 19.4   | 14.5   | 15.0   | 13.4   | 16.1   |
|     | GCC | A      | 38.0 ↑ | 34.6   | 44.5 ↑ | 39.8 ↑ | 43.9 ↑ | 50.9 ↑ | 30.2 ↑ | 31.9 ↑ | 34.1 ↑ | 33.9 ↑ |
|     |     | G      | 32.8   | 39.4   | 21.0 ↓ | 22.6 ↓ | 26.2 ↓ | 16.4 ↓ | 41.2   | 42.5   | 39.2   | 40.2   |
|     |     | C      | 11.2 ↓ | 10.0 ↓ | 15.2   | 17.5   | 15.3   | 17.5   | 13.4 ↓ | 13.8 ↓ | 12.8 ↓ | 11.0 ↓ |
|     |     | T      | 17.9   | 16.0   | 19.3   | 20.1   | 14.7   | 15.3   | 15.3   | 11.8   | 13.9   | 14.9   |
| GCT | A   | 19.3 ↓ | 22.7 ↓ | 21.3 ↓ | 22.1 ↓ | 22.5 ↓ | 17.5 ↓ | 16.5 ↓ | 13.6 ↓ | 13.2 ↓ | 15.1 ↓ |        |
|     | G   | 33.6   | 34.9   | 38.9 ↑ | 43.3 ↑ | 43.4 ↑ | 46.7 ↑ | 50.1 ↑ | 49.9 ↑ | 50.1 ↑ | 50.1 ↑ |        |
|     | C   | 23.1 ↑ | 22.8 ↑ | 17.7   | 18.2   | 15.8   | 18.0   | 19.4   | 21.7   | 20.9   | 20.1   |        |
|     | T   | 24.0 ↑ | 19.5   | 22.1   | 16.4   | 18.3   | 17.9   | 13.9   | 14.8   | 15.8   | 14.7   |        |
| Val | GTA | A      | 24.4   | 29.0   | 29.8   | 30.2   | 27.5   | 31.0   | 26.5   | 20.7   | 25.3   | 30.3   |
|     |     | G      | 41.1   | 29.0   | 29.8   | 32.0   | 32.8   | 32.2   | 32.0   | 37.0   | 39.4   | 29.7   |
|     |     | C      | 19.1   | 21.0   | 19.4   | 18.7   | 16.0   | 16.7   | 19.5   | 21.5   | 16.2   | 21.1   |
|     |     | T      | 15.4   | 21.0   | 21.1   | 19.0   | 23.7   | 20.2   | 22.0   | 20.7   | 19.2   | 18.9   |
|     | GTG | A      | 34.9 ↑ | 35.1 ↑ | 35.9 ↑ | 31.7   | 34.2 ↑ | 34.9 ↑ | 25.1   | 24.6   | 22.9   | 22.6   |
|     |     | G      | 35.3   | 36.8   | 31.9   | 36.8   | 31.6   | 34.9   | 35.7   | 36.1   | 35.7   | 36.3   |
|     |     | C      | 14.1 ↓ | 12.0 ↓ | 14.2   | 15.4   | 15.1   | 15.1 ↓ | 25.2   | 24.9   | 18.0 ↑ | 25.6   |
|     |     | T      | 15.7   | 16.1   | 18.0   | 16.1   | 19.1   | 15.1   | 14.0   | 14.4   | 13.4   | 15.6   |
|     | GTC | A      | 32.5   | 31.2   | 42.9 ↑ | 39.3 ↑ | 41.5 ↑ | 44.6 ↑ | 34.8 ↑ | 29.4 ↑ | 31.9 ↑ | 33.1 ↑ |
|     |     | G      | 26.8 ↓ | 22.0 ↓ | 16.5 ↓ | 21.4 ↓ | 20.8 ↓ | 15.3 ↓ | 29.8 ↓ | 34.9   | 33.8   | 34.2   |
|     |     | C      | 14.2   | 20.2   | 18.6   | 21.1   | 15.7   | 20.7   | 21.1   | 18.7 ↓ | 16.4 ↓ | 18.8   |
|     |     | T      | 26.5 ↑ | 26.5 ↑ | 22.0   | 18.2   | 22.0   | 19.4   | 14.3   | 17.0   | 17.9   | 14.0   |
| GTT | A   | 19.8 ↓ | 20.7 ↓ | 19.8 ↓ | 19.4 ↓ | 18.3 ↓ | 17.3 ↓ | 16.2 ↓ | 14.8 ↓ | 15.9 ↓ | 16.2 ↓ |        |
|     | G   | 38.6   | 37.7 ↑ | 41.6 ↑ | 43.5 ↑ | 44.5 ↑ | 45.4 ↑ | 49.9 ↑ | 44.3   | 54.7 ↑ | 51.1 ↑ |        |
|     | C   | 23.7 ↑ | 23.2   | 18.3   | 20.3   | 18.3   | 21.7   | 19.9   | 25.9   | 17.7   | 22.9   |        |
|     | T   | 17.9   | 18.4   | 20.3   | 16.8   | 18.9   | 15.6   | 14.0   | 15.1   | 11.7   | 9.8 ↓  |        |
| Pro | CCA | A      | 31.1 ↑ | 33.9   | 34.4 ↑ | 35.0   | 31.4   | 28.8   | 28.1   | 19.7   | 23.3   | 25.8   |
|     |     | G      | 31.1   | 28.3   | 29.4   | 27.8   | 26.9   | 30.7   | 34.9   | 31.3   | 33.6   | 29.9   |
|     |     | C      | 17.1 ↓ | 18.4   | 17.5   | 17.1   | 20.1   | 20.0   | 19.5   | 28.4   | 19.9   | 23.2   |
|     |     | T      | 20.6   | 19.4   | 18.7   | 20.1   | 21.6   | 20.5   | 17.5   | 20.7   | 23.3 ↑ | 21.1   |
|     | CCG | A      | 30.0   | 27.7   | 28.8   | 19.3 ↓ | 24.8   | 22.2   | 18.4 ↓ | 16.7 ↓ | 15.8 ↓ | 18.7 ↓ |
|     |     | G      | 34.1   | 35.3   | 41.6   | 42.9   | 34.3   | 35.2   | 32.4   | 39.6   | 38.3   | 33.3   |
|     |     | C      | 17.7   | 14.0   | 12.8   | 20.5   | 21.9   | 29.6   | 33.5 ↑ | 28.5   | 30.7 ↑ | 29.5 ↑ |
|     |     | T      | 18.2   | 23.0   | 16.8   | 17.4   | 19.0   | 13.0   | 15.7   | 15.3   | 15.1   | 18.5   |
|     | CCC | A      | 40.9 ↑ | 41.2 ↑ | 44.3 ↑ | 50.6 ↑ | 43.2 ↑ | 39.1 ↑ | 39.5 ↑ | 32.8 ↑ | 38.1 ↑ | 35.1 ↑ |
|     |     | G      | 29.9   | 27.5   | 16.1 ↓ | 21.3 ↓ | 27.1   | 18.8 ↓ | 26.2 ↓ | 31.8   | 32.8   | 33.5   |
|     |     | C      | 13.4 ↓ | 13.3   | 16.1   | 12.8   | 12.1 ↓ | 18.8   | 13.3 ↓ | 17.5 ↓ | 11.5 ↓ | 14.8 ↓ |
|     |     | T      | 15.9   | 18.0   | 23.5   | 15.2   | 17.6   | 23.2   | 21.1   | 18.0   | 17.5   | 16.6   |
| CCT | A   | 14.7 ↓ | 20.6 ↓ | 19.4 ↓ | 21.2 ↓ | 24.1 ↓ | 19.6 ↓ | 12.1 ↓ | 18.6   | 17.1 ↓ | 16.0 ↓ |        |
|     | G   | 31.1   | 34.7   | 40.1 ↑ | 37.7   | 33.4   | 40.7 ↑ | 46.7 ↑ | 40.4   | 46.8 ↑ | 45.5 ↑ |        |
|     | C   | 30.1 ↑ | 23.6 ↑ | 20.7   | 19.4   | 21.9   | 22.2   | 23.4   | 26.9   | 22.8   | 21.9   |        |
|     | T   | 24.1   | 21.0   | 19.8   | 21.7   | 20.5   | 17.5   | 17.8   | 14.1   | 13.3   | 16.5   |        |

Table S3. Continued

|     |     |   |        |        |        |        |        |        |        |        |        |        |
|-----|-----|---|--------|--------|--------|--------|--------|--------|--------|--------|--------|--------|
| Arg | AGA | A | 32.1   | 27.9   | 34.6   | 33.4   | 32.9   | 29.9   | 28.3   | 24.3   | 22.0   | 29.9   |
|     |     | G | 35.2   | 39.7 ↑ | 32.5   | 35.7   | 31.4   | 41.8 ↑ | 34.2   | 31.1   | 47.7   | 33.7   |
|     |     | C | 14.0 ↓ | 15.1   | 14.3 ↓ | 11.9 ↓ | 15.0   | 13.0 ↓ | 16.9 ↓ | 12.8   | 14.7   | 14.4 ↓ |
|     |     | T | 18.7   | 17.3   | 18.6   | 19.0   | 20.7   | 15.3   | 20.5   | 31.8 ↑ | 15.6   | 22.0   |
|     | AGG | A | 37.6 ↑ | 43.6 ↑ | 32.9   | 34.5   | 41.3 ↑ | 34.7   | 36.1 ↑ | 34.5 ↑ | 28.0 ↑ | 30.4   |
|     |     | G | 22.0 ↓ | 18.2 ↓ | 26.6   | 26.5   | 24.5   | 29.1 ↓ | 26.3 ↓ | 25.2 ↓ | 30.9   | 34.1   |
|     |     | C | 25.4   | 17.2   | 19.2   | 23.4   | 19.6   | 20.0   | 23.8   | 19.1   | 26.4   | 21.7   |
|     |     | T | 15.0   | 21.0   | 21.4   | 15.7   | 14.7   | 16.3   | 13.8   | 21.2   | 14.6   | 13.9   |
|     | CGA | A | 28.8   | 34.2   | 22.5   | 29.9   | 24.4   | 38.0   | 23.0   | 12.0   | 15.0   | 25.2   |
|     |     | G | 33.1   | 31.6   | 31.9   | 29.9   | 30.5   | 35.2   | 43.4   | 38.7   | 38.3   | 29.9   |
|     |     | C | 17.2   | 21.4   | 18.8   | 18.2   | 20.6   | 16.2   | 15.6   | 20.0   | 23.3   | 21.5   |
|     |     | T | 20.9   | 12.8   | 26.9   | 22.1   | 24.4   | 10.6   | 18.0   | 29.3   | 23.3   | 23.4   |
|     | CGG | A | 31.2   | 38.8   | 35.1   | 29.6   | 35.8   | 35.2   | 29.0   | 22.4   | 20.7   | 20.8   |
|     |     | G | 22.7   | 12.9   | 25.8   | 24.3   | 20.9   | 29.7   | 25.4 ↓ | 30.7   | 29.9   | 28.2   |
|     |     | C | 19.1   | 18.1   | 19.6   | 27.8   | 20.9   | 22.0   | 26.8   | 27.6   | 29.1   | 34.9 ↑ |
|     |     | T | 27.0   | 30.2 ↑ | 19.6   | 18.3   | 22.4   | 13.2   | 18.8   | 19.3   | 20.3   | 16.1   |
|     | CGC | A | 23.8   | 36.4   | 35.6   | 32.3   | 30.1   | 31.8   | 19.0 ↓ | 21.0   | 24.2   | 23.8   |
|     |     | G | 20.8   | 24.6 ↓ | 16.3 ↓ | 25.0   | 19.5 ↓ | 22.4 ↓ | 32.7   | 35.9   | 35.0   | 31.9   |
|     |     | C | 27.7   | 26.3   | 26.9   | 25.0   | 37.2 ↑ | 27.6 ↑ | 31.1 ↑ | 24.4   | 28.0   | 28.0   |
|     |     | T | 27.7   | 12.7   | 21.2   | 17.7   | 13.3   | 18.2   | 17.2   | 18.7   | 12.8   | 16.3   |
|     | CGT | A | 19.0 ↓ | 17.7 ↓ | 25.3   | 17.8 ↓ | 16.0 ↓ | 16.4 ↓ | 17.6 ↓ | 10.7 ↓ | 11.0 ↓ | 14.1 ↓ |
|     |     | G | 40.7 ↑ | 40.1 ↑ | 30.4   | 42.3 ↑ | 47.9 ↑ | 46.6 ↑ | 53.7 ↑ | 58.2 ↑ | 62.8 ↑ | 45.4 ↑ |
|     |     | C | 19.8   | 22.7   | 24.0   | 19.2   | 20.2   | 22.4   | 17.6   | 18.0   | 16.6   | 25.9   |
|     |     | T | 20.5   | 19.5   | 20.3   | 20.7   | 16.0   | 14.6   | 11.2   | 13.1   | 9.7    | 14.6   |
| Ser | AGC | A | 38.1 ↑ | 27.5   | 43.6 ↑ | 36.8   | 44.7 ↑ | 37.2 ↑ | 33.8 ↑ | 32.4 ↑ | 31.7 ↑ | 33.6 ↑ |
|     |     | G | 23.2   | 26.4   | 12.5 ↓ | 13.2 ↓ | 11.7 ↓ | 18.0 ↓ | 23.6 ↓ | 24.1 ↓ | 26.6 ↓ | 21.4 ↓ |
|     |     | C | 16.1   | 16.8   | 19.7   | 16.3   | 18.8   | 22.7   | 22.5   | 24.6   | 26.1   | 23.5   |
|     |     | T | 22.6   | 29.3   | 24.3   | 33.7 ↑ | 24.8   | 22.1   | 20.1   | 18.9   | 15.6   | 21.4   |
|     | AGT | A | 25.1   | 20.2 ↓ | 20.6 ↓ | 29.2   | 21.5 ↓ | 14.4 ↓ | 19.4 ↓ | 20.5   | 20.0   | 16.5 ↓ |
|     |     | G | 34.3   | 42.6 ↑ | 41.3 ↑ | 39.1 ↑ | 42.8 ↑ | 54.7 ↑ | 46.6 ↑ | 48.6 ↑ | 51.8 ↑ | 51.8 ↑ |
|     |     | C | 21.8   | 15.3   | 12.6 ↓ | 14.3   | 12.8   | 12.9 ↓ | 12.5 ↓ | 15.8   | 10.9 ↓ | 19.2   |
|     |     | T | 18.8   | 21.8   | 25.5   | 17.4   | 22.9   | 17.9   | 21.6   | 15.1   | 17.3   | 12.5 ↓ |
|     | TCA | A | 34.2   | 29.9   | 32.3   | 35.3   | 32.4   | 31.6   | 30.7   | 23.2   | 29.2   | 25.9   |
|     |     | G | 30.4   | 32.8   | 22.7 ↓ | 29.3   | 24.8 ↓ | 32.0   | 30.4   | 31.8   | 29.2   | 31.5   |
|     |     | C | 16.1   | 16.5   | 20.0   | 17.4   | 17.5   | 16.1   | 16.8   | 23.2   | 21.1   | 21.8   |
|     |     | T | 19.4   | 20.7   | 25.0   | 18.0   | 25.3   | 20.2   | 22.0   | 21.7   | 20.5   | 20.8   |
|     | TCG | A | 30.6   | 27.8   | 43.5 ↑ | 29.1   | 26.1   | 21.6   | 17.8 ↓ | 16.8 ↓ | 13.3 ↓ | 16.0 ↓ |
|     |     | G | 29.0   | 32.9   | 20.2   | 28.4   | 33.9   | 23.2   | 33.5   | 28.4   | 38.8   | 30.8   |
|     |     | C | 17.6   | 15.3 ↑ | 13.1   | 16.3   | 17.4   | 30.4 ↑ | 29.6   | 30.2 ↑ | 30.1 ↑ | 32.4 ↑ |
|     |     | T | 22.9   | 24.1   | 23.2   | 26.2   | 22.6   | 24.8   | 19.1   | 24.6   | 17.8   | 20.8   |
|     | TCC | A | 37.9 ↑ | 41.5 ↑ | 35.3   | 37.7   | 45.8 ↑ | 37.7 ↑ | 39.0 ↑ | 32.7 ↑ | 32.9 ↑ | 28.9   |
|     |     | G | 25.4   | 23.4 ↓ | 20.3 ↓ | 14.3 ↓ | 23.7 ↓ | 18.0 ↓ | 24.9 ↓ | 28.9   | 29.7   | 30.1   |
|     |     | C | 15.1   | 13.1   | 15.7   | 23.8   | 10.6 ↓ | 17.3   | 15.8   | 17.6   | 18.3   | 19.2   |
|     |     | T | 21.5   | 22.0   | 28.7   | 24.2   | 19.9   | 27.0   | 20.3   | 20.8   | 19.1   | 21.8   |
|     | TCT | A | 19.7 ↓ | 20.8 ↓ | 21.2 ↓ | 19.1 ↓ | 17.7 ↓ | 17.8 ↓ | 18.1 ↓ | 12.5 ↓ | 12.9 ↓ | 15.6 ↓ |
|     |     | G | 31.7   | 31.9   | 35.2 ↑ | 37.4 ↑ | 37.6 ↑ | 41.3 ↑ | 48.8 ↑ | 44.4 ↑ | 46.1 ↑ | 47.9 ↑ |
|     |     | C | 25.0   | 24.4 ↑ | 21.8   | 20.9   | 19.8 ↑ | 22.1   | 17.8   | 22.2   | 20.8   | 17.6   |
|     |     | T | 23.6   | 23.0   | 21.8   | 22.5   | 25.0   | 18.8   | 15.3   | 20.8   | 20.2   | 19.0   |



Table S3. Continued

|     |     |   |        |        |        |        |        |        |        |        |        |        |
|-----|-----|---|--------|--------|--------|--------|--------|--------|--------|--------|--------|--------|
| Leu | CTA | A | 33.8   | 31.7   | 35.5   | 30.6   | 28.0   | 30.9   | 28.1   | 27.1   | 22.0   | 25.5   |
|     |     | G | 29.5   | 37.6   | 30.5   | 32.3   | 28.3   | 30.9   | 26.3 ↓ | 33.9   | 46.0   | 35.4   |
|     |     | C | 15.8   | 13.6 ↓ | 13.6 ↓ | 18.5   | 19.7   | 17.4   | 25.4   | 17.8   | 16.0   | 21.7   |
|     |     | T | 20.9   | 17.1   | 20.4   | 18.5   | 24.0   | 20.9   | 20.1   | 21.2   | 16.0   | 17.4   |
|     | CTG | A | 38.8 ↑ | 38.3 ↑ | 36.1   | 27.3   | 28.0   | 33.5   | 25.0   | 21.6   | 21.8   | 21.1 ↓ |
|     |     | G | 28.8   | 27.2   | 26.1   | 30.4   | 24.8   | 32.6   | 33.6   | 36.2   | 38.1   | 35.6   |
|     |     | C | 14.0   | 19.8   | 20.6   | 22.5   | 19.9   | 21.2   | 27.0   | 29.8 ↑ | 28.3 ↑ | 31.3 ↑ |
|     |     | T | 18.3   | 14.8   | 17.2   | 19.7   | 27.2 ↑ | 12.8 ↓ | 14.3   | 12.4   | 11.8   | 11.9   |
|     | CTC | A | 31.6   | 28.4   | 41.7 ↑ | 38.5 ↑ | 37.5 ↑ | 37.6 ↑ | 28.3   | 32.1 ↑ | 31.3 ↑ | 33.1 ↑ |
|     |     | G | 22.9 ↓ | 25.8 ↓ | 11.6 ↓ | 14.8 ↓ | 20.4 ↓ | 13.0 ↓ | 28.7 ↓ | 29.6 ↓ | 30.5 ↓ | 28.4 ↓ |
|     |     | C | 16.7   | 21.3   | 20.7   | 19.9   | 18.1   | 24.4   | 24.1   | 21.0   | 22.1   | 23.1   |
|     |     | T | 28.9 ↑ | 24.5 ↑ | 26.0 ↑ | 26.8 ↑ | 24.0   | 25.0 ↑ | 18.9   | 17.3   | 16.1   | 15.5   |
|     | CTT | A | 17.1 ↓ | 17.0 ↓ | 21.3 ↓ | 14.7 ↓ | 16.8 ↓ | 15.8 ↓ | 17.4 ↓ | 12.4 ↓ | 13.1 ↓ | 14.4 ↓ |
|     |     | G | 38.0 ↑ | 40.6 ↑ | 34.8 ↑ | 37.5 ↑ | 37.4 ↑ | 43.9 ↑ | 46.5 ↑ | 52.2 ↑ | 51.1 ↑ | 49.8 ↑ |
|     |     | C | 26.5 ↑ | 27.4 ↑ | 22.7 ↑ | 26.0 ↑ | 27.3 ↑ | 26.3 ↑ | 22.0   | 21.7   | 27.3   | 23.2   |
|     |     | T | 18.4   | 15.0   | 21.2   | 21.7   | 18.5   | 13.9   | 14.1   | 13.7   | 8.5 ↓  | 12.6   |
|     | TTA | A | 24.6   | 23.9   | 31.4   | 34.6 ↑ | 30.5   | 31.0   | 22.3   | 19.2   | 25.0   | 30.3   |
|     |     | G | 37.3   | 35.2   | 28.7   | 28.5   | 33.9   | 31.4   | 34.9   | 35.9   | 42.5   | 34.8   |
|     |     | C | 18.1   | 19.0   | 18.2   | 18.9   | 14.8 ↓ | 16.5   | 22.3   | 30.8   | 15.0   | 20.6   |
|     |     | T | 20.0   | 21.9   | 21.7   | 18.0   | 20.8   | 21.2   | 20.5   | 14.1   | 17.5   | 14.2   |
|     | TTG | A | 33.5 ↑ | 30.1   | 32.0   | 32.3   | 36.0 ↑ | 29.9   | 26.0   | 27.5   | 30.0   | 29.4   |
|     |     | G | 35.2   | 30.9   | 30.6   | 34.2   | 31.4   | 37.0   | 39.7   | 41.4   | 41.9   | 36.1   |
|     |     | C | 16.1   | 19.8   | 17.8   | 19.8   | 17.6   | 17.5 ↓ | 18.8 ↓ | 21.1   | 12.3 ↓ | 21.1   |
|     |     | T | 15.2 ↓ | 19.2   | 19.6   | 13.7 ↓ | 15.0 ↓ | 15.7   | 15.5   | 10.0   | 15.9   | 13.4   |

Significantly large and small values ( $P = 0.01$ ) are indicated with an upward or downward arrow, respectively.

Table S4. Optimum codons and certainty factors calculated as indicated in Materials and Methods

| <i>A. thaliana</i> |                                                                        |                       |                   |                   |
|--------------------|------------------------------------------------------------------------|-----------------------|-------------------|-------------------|
| Aminoacid          | Optimum codon and certainty factor when subsequent codon is headed by: |                       |                   |                   |
|                    | A                                                                      | G                     | C                 | T                 |
| Lys                | <b>AAG</b><br>87%                                                      | AAA<br>86%            | <b>AAG</b><br>85% | AAA<br>83%        |
| Asn                | AAC<br>89%                                                             | <b>AAT</b><br>90%     | <b>AAT</b><br>86% | AAC<br>85%        |
| Glu                | GAG<br>87%                                                             | <b>GAA</b><br>89%     | GAG<br>84%        | GAG<br>85%        |
| Asp                | <b>GAT</b><br>86%                                                      | nc<br>93%             | nc<br>89%         | nc<br>89%         |
| Gln                | CAG<br>83%                                                             | <b>CAA</b><br>90%     | CAG<br>84%        | CAG<br>83%        |
| His                | CAC<br>86%                                                             | <b>CAT</b><br>91%     | <b>CAT</b><br>87% | <b>CAT</b><br>84% |
| Tyr                | TAC<br>89%                                                             | <b>TAT</b><br>89%     | <b>TAT</b><br>84% | TAC<br>85%        |
| Cys                | TGC<br>86%                                                             | <b>TGT</b><br>92%     | <b>TGT</b><br>92% | TGC<br>85%        |
| Phe                | TTC<br>88%                                                             | <b>TTT</b><br>90%     | TTC<br>84%        | TTC<br>87%        |
| Ile                | ATC<br>82%                                                             | <b>ATT</b><br>84%     | <b>ATT</b><br>83% | ATC<br>81%        |
| Thr                | ACA<br>79%                                                             | <b>ACT</b><br>80%     | <b>ACT</b><br>82% | <b>ACT</b><br>79% |
| Gly                | <b>GGA</b><br>80%                                                      | <b>GGA</b><br>81%     | GGT<br>80%        | GGT<br>79%        |
| Ala                | GCA<br>77%                                                             | <b>GCT</b><br>81%     | <b>GCT</b><br>86% | <b>GCT</b><br>84% |
| Val                | GTG<br>78%                                                             | <b>GTT</b><br>81%     | <b>GTT</b><br>84% | <b>GTT</b><br>80% |
| Pro                | CCA<br>81%                                                             | <b>CCT</b><br>79%     | <b>CCT</b><br>85% | <b>CCT</b><br>81% |
| Arg                | <b>AGA</b><br>71%                                                      | <b>AGA</b><br>69%     | AGG<br>64%        | <b>AGA</b><br>65% |
| Ser                | TCC<br>58%                                                             | <b>TCT</b><br>64%     | <b>TCT</b><br>65% | <b>TCT</b><br>63% |
| Leu                | CTG<br>67%                                                             | <b>CTG/CTT</b><br>64% | <b>CTT</b><br>68% | CTG<br>65%        |

| <i>B. napus</i> |                                                                        |                   |                   |                   |
|-----------------|------------------------------------------------------------------------|-------------------|-------------------|-------------------|
| Aminoacid       | Optimum codon and certainty factor when subsequent codon is headed by: |                   |                   |                   |
|                 | A                                                                      | G                 | C                 | T                 |
| Lys             | <b>AAG</b><br>90%                                                      | AAA<br>84%        | <b>AAG</b><br>85% | <b>AAG</b><br>86% |
| Asn             | <b>AAC</b><br>92%                                                      | nc<br>84%         | nc<br>88%         | nc<br>91%         |
| Glu             | <b>GAG</b><br>90%                                                      | <b>GAA</b><br>86% | <b>GAG</b><br>88% | <b>GAG</b><br>88% |
| Asp             | GAC<br>86%                                                             | <b>GAT</b><br>88% | <b>GAT</b><br>85% | GAC<br>84%        |
| Gln             | <b>CAG</b><br>86%                                                      | CAA<br>90%        | <b>CAG</b><br>85% | <b>CAG</b><br>90% |
| His             | CAC<br>88%                                                             | <b>CAT</b><br>84% | <b>CAT</b><br>85% | <b>CAT</b><br>85% |
| Tyr             | <b>TAC</b><br>93%                                                      | <b>TAC</b><br>83% | TAT<br>83%        | <b>TAC</b><br>89% |
| Cys             | <b>TGC</b><br>86%                                                      | TGT<br>87%        | <b>TGC</b><br>86% | <b>TGC</b><br>85% |
| Phe             | <b>TTC</b><br>90%                                                      | TTT<br>85%        | <b>TTC</b><br>88% | <b>TTC</b><br>91% |
| Ile             | <b>ATC</b><br>84%                                                      | ATT<br>82%        | <b>ATC</b><br>81% | <b>ATC</b><br>82% |
| Thr             | ACC<br>77%                                                             | ACC<br>77%        | <b>ACT</b><br>80% | <b>ACT</b><br>78% |
| Gly             | <b>GGA</b><br>80%                                                      | <b>GGA</b><br>80% | GGT<br>79%        | GGT<br>78%        |
| Ala             | <b>GCT</b><br>77%                                                      | nc<br>80%         | nc<br>84%         | nc<br>82%         |
| Val             | GTG<br>78%                                                             | <b>GTT</b><br>80% | <b>GTT</b><br>80% | GTC<br>78%        |
| Pro             | CCA<br>78%                                                             | <b>CCT</b><br>80% | <b>CCT</b><br>82% | <b>CCT</b><br>79% |
| Arg             | AGG<br>67%                                                             | <b>AGA</b><br>68% | CGA<br>62%        | AGG<br>64%        |
| Ser             | TCC<br>62%                                                             | <b>TCT</b><br>58% | <b>TCT</b><br>62% | <b>TCT</b><br>56% |
| Leu             | CTG<br>69%                                                             | <b>CTT</b><br>67% | <b>CTT</b><br>68% | CTG/CTC<br>65%    |

Table S4. Continued

| <i>L. esculentum</i> |                                                                        |            |            |            |
|----------------------|------------------------------------------------------------------------|------------|------------|------------|
| Aminoacid            | Optimum codon and certainty factor when subsequent codon is headed by: |            |            |            |
|                      | A                                                                      | G          | C          | T          |
| Lys                  | AAG<br>85%                                                             | AAA<br>86% | AAG<br>85% | AAA<br>85% |
| Asn                  | AAC<br>84%                                                             | AAT<br>94% | AAT<br>89% | AAT<br>84% |
| Glu                  | GAA<br>84%                                                             | nc<br>87%  | nc<br>86%  | nc<br>86%  |
| Asp                  | GAT<br>86%                                                             | nc<br>96%  | nc<br>92%  | nc<br>89%  |
| Gln                  | CAA<br>85%                                                             | nc<br>89%  | nc<br>86%  | nc<br>86%  |
| His                  | CAC<br>83%                                                             | CAT<br>96% | CAT<br>88% | CAT<br>87% |
| Tyr                  | TAC<br>84%                                                             | TAT<br>93% | TAT<br>87% | TAT<br>87% |
| Cys                  | TGC<br>85%                                                             | TGT<br>95% | TGT<br>83% | TGT<br>85% |
| Phe                  | TTC<br>84%                                                             | TTT<br>95% | TTT<br>87% | TTT<br>85% |
| Ile                  | ATC<br>79%                                                             | ATT<br>86% | ATT<br>86% | ATT<br>82% |
| Thr                  | ACA<br>79%                                                             | ACT<br>83% | ACT<br>80% | ACT<br>80% |
| Gly                  | GGA<br>78%                                                             | GGT<br>80% | GGT<br>78% | GGT<br>78% |
| Ala                  | GCA<br>79%                                                             | GCT<br>85% | GCT<br>83% | GCT<br>83% |
| Val                  | GTT<br>76%                                                             | nc<br>85%  | nc<br>82%  | nc<br>81%  |
| Pro                  | CCA<br>81%                                                             | CCT<br>83% | CCT<br>82% | CCT<br>81% |
| Arg                  | AGA<br>70%                                                             | nc<br>71%  | nc<br>63%  | nc<br>67%  |
| Ser                  | TCT<br>57%                                                             | nc<br>65%  | nc<br>64%  | nc<br>60%  |
| Leu                  | CTG<br>65%                                                             | CTG<br>64% | CTG<br>65% | CTG<br>64% |

| <i>N. tabacum</i> |                                                                        |            |            |            |
|-------------------|------------------------------------------------------------------------|------------|------------|------------|
| Aminoacid         | Optimum codon and certainty factor when subsequent codon is headed by: |            |            |            |
|                   | A                                                                      | G          | C          | T          |
| Lys               | AAG<br>86%                                                             | AAA<br>85% | AAG<br>87% | AAA<br>85% |
| Asn               | AAC<br>86%                                                             | AAT<br>94% | AAT<br>87% | AAT<br>84% |
| Glu               | GAA<br>83%                                                             | GAA<br>88% | GAG<br>83% | GAA<br>84% |
| Asp               | GAT<br>85%                                                             | nc<br>93%  | nc<br>90%  | nc<br>87%  |
| Gln               | CAA<br>84%                                                             | nc<br>88%  | nc<br>85%  | nc<br>86%  |
| His               | CAC<br>87%                                                             | CAT<br>93% | CAT<br>88% | CAT<br>89% |
| Tyr               | TAC<br>85%                                                             | TAT<br>93% | TAT<br>84% | TAT<br>85% |
| Cys               | TGC<br>87%                                                             | TGT<br>95% | TGT<br>85% | TGT<br>83% |
| Phe               | TTC<br>88%                                                             | TTT<br>95% | TTT<br>83% | TTC<br>84% |
| Ile               | ATT<br>79%                                                             | nc<br>88%  | nc<br>83%  | nc<br>80%  |
| Thr               | ACA<br>79%                                                             | ACT<br>81% | ACT<br>79% | ACT<br>80% |
| Gly               | GGA<br>80%                                                             | GGT<br>81% | GGT<br>78% | GGT<br>79% |
| Ala               | GCA<br>79%                                                             | GCT<br>83% | GCT<br>81% | GCT<br>79% |
| Val               | GTT<br>76%                                                             | nc<br>83%  | nc<br>81%  | nc<br>80%  |
| Pro               | CCA<br>81%                                                             | CCT<br>81% | CCT<br>80% | CCT<br>80% |
| Arg               | AGA<br>70%                                                             | AGA<br>67% | AGG<br>65% | AGA<br>66% |
| Ser               | TCT<br>56%                                                             | nc<br>66%  | nc<br>65%  | nc<br>58%  |
| Leu               | CTG<br>64%                                                             | CTG<br>66% | CTG<br>66% | CTT<br>66% |

Table S4. Continued

| <i>P. sativum</i> |                                                                        |                   |                   |                   |
|-------------------|------------------------------------------------------------------------|-------------------|-------------------|-------------------|
| Aminoacid         | Optimum codon and certainty factor when subsequent codon is headed by: |                   |                   |                   |
|                   | A                                                                      | G                 | C                 | T                 |
| Lys               | <b>AAG</b><br>85%                                                      | AAA<br>84%        | <b>AAG</b><br>83% | AAA<br>83%        |
| Asn               | AAC<br>87%                                                             | <b>AAT</b><br>93% | <b>AAT</b><br>84% | <b>AAT</b><br>84% |
| Glu               | <b>GAA</b><br>85%                                                      | <b>GAA</b><br>88% | <b>GAA</b><br>85% | GAG<br>83%        |
| Asp               | <b>GAT</b><br>85%                                                      | nc<br>95%         | nc<br>89%         | nc<br>89%         |
| Gln               | <b>CAA</b><br>86%                                                      | nc<br>90%         | nc<br>86%         | nc<br>87%         |
| His               | CAC<br>85%                                                             | <b>CAT</b><br>93% | <b>CAT</b><br>85% | <b>CAT</b><br>86% |
| Tyr               | TAC<br>86%                                                             | <b>TAT</b><br>93% | <b>TAT</b><br>86% | <b>TAT</b><br>85% |
| Cys               | TGC<br>86%                                                             | TGT<br>94%        | TGT<br>89%        | TGT<br>86%        |
| Phe               | TTC<br>88%                                                             | TTT<br>95%        | TTT<br>83%        | TTC<br>84%        |
| Ile               | ATC<br>80%                                                             | <b>ATT</b><br>88% | <b>ATT</b><br>85% | <b>ATT</b><br>80% |
| Thr               | ACA<br>79%                                                             | <b>ACT</b><br>82% | <b>ACT</b><br>81% | <b>ACT</b><br>80% |
| Gly               | GGA<br>81%                                                             | <b>GGT</b><br>82% | <b>GGT</b><br>78% | <b>GGT</b><br>82% |
| Ala               | GCA<br>78%                                                             | <b>GCT</b><br>85% | <b>GCT</b><br>81% | <b>GCT</b><br>82% |
| Val               | GTG/ <b>GTT</b><br>76%                                                 | <b>GTT</b><br>85% | <b>GTT</b><br>83% | <b>GTT</b><br>80% |
| Pro               | CCA<br>79%                                                             | <b>CCT</b><br>81% | <b>CCT</b><br>81% | <b>CCT</b><br>80% |
| Arg               | <b>AGA</b><br>71%                                                      | nc<br>66%         | nc<br>62%         | nc<br>70%         |
| Ser               | TCC<br>59%                                                             | <b>TCT</b><br>67% | <b>TCT</b><br>65% | <b>TCT</b><br>63% |
| Leu               | CTG<br>64%                                                             | <b>CTT</b><br>64% | <b>CTT</b><br>69% | CTG<br>65%        |

| <i>G. max</i> |                                                                        |                   |                   |                   |
|---------------|------------------------------------------------------------------------|-------------------|-------------------|-------------------|
| Aminoacid     | Optimum codon and certainty factor when subsequent codon is headed by: |                   |                   |                   |
|               | A                                                                      | G                 | C                 | T                 |
| Lys           | <b>AAG</b><br>88%                                                      | nc<br>85%         | nc<br>88%         | nc<br>84%         |
| Asn           | <b>AAC</b><br>91%                                                      | AAT<br>93%        | <b>AAC</b><br>86% | <b>AAC</b><br>84% |
| Glu           | GAG<br>85%                                                             | <b>GAA</b><br>86% | <b>GAA</b><br>83% | GAG<br>84%        |
| Asp           | GAC<br>85%                                                             | <b>GAT</b><br>94% | <b>GAT</b><br>87% | <b>GAT</b><br>87% |
| Gln           | CAG<br>84%                                                             | <b>CAA</b><br>87% | CAG<br>83%        | <b>CAA</b><br>83% |
| His           | CAC<br>88%                                                             | <b>CAT</b><br>92% | <b>CAT</b><br>84% | <b>CAT</b><br>84% |
| Tyr           | TAC<br>91%                                                             | <b>TAT</b><br>94% | <b>TAT</b><br>83% | TAC<br>86%        |
| Cys           | <b>TGC</b><br>94%                                                      | TGT<br>95%        | <b>TGC</b><br>86% | <b>TGC</b><br>87% |
| Phe           | TTC<br>90%                                                             | TTT<br>94%        | TTC<br>85%        | TTC<br>85%        |
| Ile           | ATC<br>81%                                                             | <b>ATT</b><br>89% | <b>ATT</b><br>84% | <b>ATT</b><br>80% |
| Thr           | ACC<br>79%                                                             | <b>ACT</b><br>83% | <b>ACT</b><br>78% | <b>ACT</b><br>79% |
| Gly           | <b>GGA</b><br>80%                                                      | GGT<br>81%        | GGT<br>78%        | GGT<br>77%        |
| Ala           | GCC<br>79%                                                             | <b>GCT</b><br>84% | <b>GCT</b><br>80% | <b>GCT</b><br>80% |
| Val           | GTG<br>78%                                                             | <b>GTT</b><br>84% | <b>GTT</b><br>83% | <b>GTT</b><br>80% |
| Pro           | CCA<br>79%                                                             | <b>CCT</b><br>82% | <b>CCT</b><br>80% | CCA<br>79%        |
| Arg           | <b>AGA</b><br>67%                                                      | <b>AGA</b><br>67% | CGG<br>61%        | <b>AGA</b><br>65% |
| Ser           | TCC<br>59%                                                             | <b>TCT</b><br>62% | <b>TCT</b><br>60% | <b>TCT</b><br>58% |
| Leu           | CTG<br>69%                                                             | CTG<br>68%        | CTG<br>69%        | CTG<br>66%        |

Table S4. Continued

| <i>O. sativa</i> |                                                                        |                   |                   |                   | <i>T. aestivum</i> |                   |                   |                   |                   |                   |                   |                   |
|------------------|------------------------------------------------------------------------|-------------------|-------------------|-------------------|--------------------|-------------------|-------------------|-------------------|-------------------|-------------------|-------------------|-------------------|
| Aminoacid        | Optimum codon and certainty factor when subsequent codon is headed by: |                   |                   |                   | A                  | G                 | C                 | T                 | A                 | G                 | C                 | T                 |
|                  | A                                                                      | G                 | C                 | T                 |                    |                   |                   |                   |                   |                   |                   |                   |
| Lys              | <b>AAG</b><br>92%                                                      | nc<br>90%         | nc<br>92%         | nc<br>85%         | <b>AAG</b><br>94%  | nc<br>93%         | nc<br>93%         | nc<br>90%         | <b>AAG</b><br>94% | nc<br>93%         | nc<br>93%         | nc<br>90%         |
| Asn              | <b>AAC</b><br>92%                                                      | <b>AAT</b><br>86% | <b>AAC</b><br>90% | <b>AAC</b><br>90% | <b>AAC</b><br>93%  | nc<br>86%         | nc<br>92%         | nc<br>92%         | <b>AAC</b><br>93% | nc<br>86%         | nc<br>92%         | nc<br>92%         |
| Glu              | <b>GAG</b><br>89%                                                      | nc<br>87%         | nc<br>89%         | nc<br>87%         | <b>GAG</b><br>93%  | nc<br>90%         | nc<br>92%         | nc<br>89%         | <b>GAG</b><br>93% | nc<br>90%         | nc<br>92%         | nc<br>89%         |
| Asp              | <b>GAC</b><br>90%                                                      | <b>GAT</b><br>87% | <b>GAC</b><br>83% | <b>GAC</b><br>84% | <b>GAC</b><br>92%  | nc<br>85%         | nn<br>90%         | nc<br>90%         | <b>GAC</b><br>92% | nc<br>85%         | nn<br>90%         | nc<br>90%         |
| Gln              | <b>CAG</b><br>89%                                                      | nc<br>85%         | nc<br>89%         | nc<br>89%         | <b>CAG</b><br>91%  | nc<br>89%         | nc<br>84%         | nc<br>89%         | <b>CAG</b><br>91% | nc<br>89%         | nc<br>84%         | nc<br>89%         |
| His              | <b>CAC</b><br>88%                                                      | <b>CAT</b><br>88% | <b>CAC</b><br>86% | <b>CAC</b><br>89% | <b>CAC</b><br>92%  | nc<br>85%         | nc<br>92%         | nc<br>88%         | <b>CAC</b><br>92% | nc<br>85%         | nc<br>92%         | nc<br>88%         |
| Tyr              | <b>TAC</b><br>95%                                                      | <b>TAT</b><br>87% | <b>TAC</b><br>87% | <b>TAC</b><br>89% | <b>TAC</b><br>95%  | nc<br>86%         | nc<br>91%         | nc<br>91%         | <b>TAC</b><br>95% | nc<br>86%         | nc<br>91%         | nc<br>91%         |
| Cys              | <b>TGC</b><br>95%                                                      | <b>TGT</b><br>84% | <b>TGC</b><br>93% | <b>TGC</b><br>93% | <b>TGC</b><br>95%  | nc<br>84%         | nc<br>93%         | nc<br>93%         | <b>TGC</b><br>95% | nc<br>84%         | nc<br>93%         | nc<br>93%         |
| Phe              | <b>TTC</b><br>92%                                                      | <b>TTT</b><br>85% | <b>TTC</b><br>90% | <b>TTC</b><br>91% | <b>TTC</b><br>95%  | nc<br>84%         | nc<br>93%         | nc<br>92%         | <b>TTC</b><br>95% | nc<br>84%         | nc<br>93%         | nc<br>92%         |
| Ile              | <b>ATC</b><br>86%                                                      | <b>ATT</b><br>85% | <b>ATC</b><br>84% | <b>ATC</b><br>80% | <b>ATC</b><br>93%  | nc<br>85%         | nc<br>89%         | nc<br>86%         | <b>ATC</b><br>93% | nc<br>85%         | nc<br>89%         | nc<br>86%         |
| Thr              | <b>ACC</b><br>80%                                                      | <b>ACT</b><br>78% | <b>ACC</b><br>76% | <b>ACC</b><br>76% | <b>ACC</b><br>85%  | <b>ACC</b><br>80% | <b>ACG</b><br>78% | <b>ACC</b><br>79% | <b>ACC</b><br>85% | <b>ACC</b><br>80% | <b>ACG</b><br>78% | <b>ACC</b><br>79% |
| Gly              | <b>GGC</b><br>78%                                                      | nc<br>78%         | nc<br>78%         | nc<br>76%         | <b>GGC</b><br>83%  | nc<br>82%         | nc<br>80%         | nc<br>80%         | <b>GGC</b><br>83% | nc<br>82%         | nc<br>80%         | nc<br>80%         |
| Ala              | <b>GCC</b><br>79%                                                      | <b>GCT</b><br>77% | <b>GCG</b><br>76% | <b>GCC</b><br>77% | <b>GCC</b><br>84%  | <b>GCC</b><br>81% | <b>GCG</b><br>79% | <b>GCC</b><br>78% | <b>GCC</b><br>84% | <b>GCC</b><br>81% | <b>GCG</b><br>79% | <b>GCC</b><br>78% |
| Val              | <b>GTC</b><br>80%                                                      | <b>GTT</b><br>78% | <b>GTG</b><br>79% | <b>GTG</b><br>77% | <b>GTC</b><br>80%  | <b>GTG</b><br>79% | <b>GTG</b><br>80% | <b>GTC</b><br>79% | <b>GTC</b><br>80% | <b>GTG</b><br>79% | <b>GTG</b><br>80% | <b>GTC</b><br>79% |
| Pro              | <b>CCC</b><br>78%                                                      | <b>CCT</b><br>78% | <b>CCG</b><br>79% | <b>CCC</b><br>75% | <b>CCC</b><br>79%  | <b>CCG</b><br>76% | <b>CCG</b><br>77% | <b>CCA</b><br>77% | <b>CCC</b><br>79% | <b>CCG</b><br>76% | <b>CCG</b><br>77% | <b>CCA</b><br>77% |
| Arg              | <b>AGG</b><br>68%                                                      | <b>CGG</b><br>65% | <b>CGG</b><br>68% | <b>CGG</b><br>66% | <b>AGG</b><br>68%  | <b>CGG</b><br>68% | <b>CGG</b><br>71% | <b>CGG</b><br>66% | <b>AGG</b><br>68% | <b>CGG</b><br>68% | <b>CGG</b><br>71% | <b>CGG</b><br>66% |
| Ser              | <b>TCC</b><br>61%                                                      | <b>TCT</b><br>58% | <b>TCC</b><br>58% | <b>TCC</b><br>57% | <b>TCC</b><br>64%  | nc<br>61%         | nc<br>61%         | nc<br>64%         | <b>TCC</b><br>64% | nc<br>61%         | nc<br>61%         | nc<br>64%         |
| Leu              | <b>CTG</b><br>72%                                                      | <b>CTG</b><br>71% | <b>CTG</b><br>73% | <b>CTG</b><br>70% | <b>CTC</b><br>76%  | <b>CTG</b><br>74% | <b>CTG</b><br>76% | <b>CTC</b><br>76% | <b>CTC</b><br>76% | <b>CTG</b><br>74% | <b>CTG</b><br>76% | <b>CTC</b><br>76% |

Table S4. Continued

| <i>H. vulgare</i> |                                                                        |                   |                   |                   |
|-------------------|------------------------------------------------------------------------|-------------------|-------------------|-------------------|
| Aminoacid         | Optimum codon and certainty factor when subsequent codon is headed by: |                   |                   |                   |
|                   | A                                                                      | G                 | C                 | T                 |
| Lys               | <b>AAG</b><br>95%                                                      | nc<br>93%         | nc<br>96%         | nc<br>91%         |
| Asn               | <b>AAC</b><br>96%                                                      | nc<br>88%         | nc<br>93%         | nc<br>95%         |
| Glu               | <b>GAG</b><br>96%                                                      | nc<br>91%         | nc<br>94%         | nc<br>92%         |
| Asp               | <b>GAC</b><br>94%                                                      | nc<br>87%         | nc<br>92%         | nc<br>92%         |
| Gln               | <b>CAG</b><br>91%                                                      | nc<br>89%         | nc<br>93%         | nc<br>94%         |
| His               | <b>CAC</b><br>94%                                                      | nc<br>85%         | nc<br>93%         | nc<br>93%         |
| Tyr               | <b>TAC</b><br>96%                                                      | nc<br>88%         | nc<br>95%         | nc<br>96%         |
| Cys               | <b>TGC</b><br>96%                                                      | nc<br>87%         | nc<br>97%         | nc<br>96%         |
| Phe               | <b>TTC</b><br>96%                                                      | nc<br>89%         | nc<br>97%         | nc<br>94%         |
| Ile               | <b>ATC</b><br>93%                                                      | nc<br>85%         | nc<br>91%         | nc<br>86%         |
| Thr               | <b>ACC</b><br>87%                                                      | nc<br>81%         | nc<br>80%         | nc<br>82%         |
| Gly               | <b>GGC</b><br>85%                                                      | nc<br>82%         | nc<br>81%         | nc<br>80%         |
| Ala               | <b>GCC</b><br>86%                                                      | <b>GCC</b><br>81% | GCG<br>80%        | <b>GCC</b><br>80% |
| Val               | GTC<br>82%                                                             | <b>GTG</b><br>79% | <b>GTG</b><br>84% | GTC<br>81%        |
| Pro               | CCC<br>81%                                                             | <b>CCG</b><br>77% | <b>CCG</b><br>82% | CCC<br>76%        |
| Arg               | CGG<br>70%                                                             | CGG<br>68%        | CGG<br>72%        | CGG<br>72%        |
| Ser               | <b>TCC</b><br>64%                                                      | nc<br>61%         | nc<br>62%         | nc<br>65%         |
| Leu               | <b>CTC</b><br>78%                                                      | CTG<br>76%        | CTG<br>78%        | <b>CTC</b><br>77% |

| <i>Z. mays</i> |                                                                        |                   |                   |                   |
|----------------|------------------------------------------------------------------------|-------------------|-------------------|-------------------|
| Aminoacid      | Optimum codon and certainty factor when subsequent codon is headed by: |                   |                   |                   |
|                | A                                                                      | G                 | C                 | T                 |
| Lys            | <b>AAG</b><br>91%                                                      | nc<br>90%         | nc<br>93%         | nc<br>91%         |
| Asn            | <b>AAC</b><br>92%                                                      | AAT<br>85%        | <b>AAC</b><br>89% | <b>AAC</b><br>90% |
| Glu            | <b>GAG</b><br>89%                                                      | nc<br>87%         | nc<br>90%         | nc<br>89%         |
| Asp            | <b>GAC</b><br>90%                                                      | nc<br>83%         | nc<br>88%         | nc<br>86%         |
| Gln            | <b>CAG</b><br>88%                                                      | nc<br>90%         | nc<br>91%         | nc<br>90%         |
| His            | <b>CAC</b><br>89%                                                      | CAT<br>85%        | <b>CAC</b><br>90% | <b>CAC</b><br>87% |
| Tyr            | <b>TAC</b><br>94%                                                      | TAT<br>84%        | <b>TAC</b><br>91% | <b>TAC</b><br>91% |
| Cys            | <b>TGC</b><br>92%                                                      | TGT<br>86%        | <b>TGC</b><br>95% | <b>TGC</b><br>91% |
| Phe            | <b>TTC</b><br>93%                                                      | nc<br>84%         | nc<br>90%         | nc<br>92%         |
| Ile            | <b>ATC</b><br>88%                                                      | nc<br>81%         | nc<br>87%         | nc<br>86%         |
| Thr            | <b>ACC</b><br>81%                                                      | ACT<br>77%        | <b>ACC</b><br>77% | <b>ACC</b><br>77% |
| Gly            | <b>GGC</b><br>82%                                                      | nc<br>78%         | nc<br>79%         | nc<br>76%         |
| Ala            | <b>GCC</b><br>81%                                                      | GCT<br>77%        | GCG<br>80%        | <b>GCC</b><br>76% |
| Val            | GTC<br>79%                                                             | <b>GTG</b><br>78% | <b>GTG</b><br>81% | <b>GTG</b><br>81% |
| Pro            | CCC<br>78%                                                             | CCT<br>77%        | <b>CCG</b><br>79% | <b>CCG</b><br>76% |
| Arg            | CGG<br>65%                                                             | nc<br>66%         | nc<br>71%         | nc<br>65%         |
| Ser            | TCC<br>59%                                                             | TCT<br>59%        | TCC<br>58%        | TCC<br>61%        |
| Leu            | <b>CTG</b><br>72%                                                      | nc<br>74%         | nc<br>77%         | nc<br>73%         |
